# Supplementary material for: Measurement of size-dependent single scattering albedo of fresh biomassburning aerosols using the extinction-minus-scattering technique with acombination of cavity ring-down spectroscopy and nephelometry
Source: Copernicus journal article supplement (doi:10.5194/acp-16-13491-2016), 2016-11-01
Supplement: Supplementary file 1 [file acp-16-13491-2016-supplement.zip]

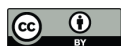

## *Supplement of*

# **Measurement of size-dependent single scattering albedo of fresh biomass burning aerosols using the extinction-minus-scattering technique with a combination of cavity ring-down spectroscopy and nephelometry**

**Sujeeta Singh et al.**

*Correspondence to:* Solomon Bililign (bililignsol@gmail.com)

- [acp-16-13491-2016-supplement-title-page.pdf](#)
- [Copy of acp-2016-298-Data.xlsx](#)
- [acp-2016-298-definitions of abbreviations in data file.docx](#)

The copyright of individual parts of the supplement might differ from the CC-BY 3.0 licence.
