# Supplementary material for: Measurement of size-dependent single scattering albedo of fresh biomassburning aerosols using the extinction-minus-scattering technique with acombination of cavity ring-down spectroscopy and nephelometry
Source: Copernicus journal article supplement (doi:10.5194/acp-16-13491-2016), 2016-11-01
Supplement: Supplementary file 1 [file Copy of acp-2016-298-Data.xlsx]

## Sheet: Flaming-500
WL	CF_500	CF+Error	CF-Error	RF_500	RF+Error	RF-Error	WF-500	WF+Error	WF-Error
660	0.651175	0.730809	0.571542	0.664486	0.74412	0.584853	0.74358	0.823214	0.663947
659	0.552185	0.628456	0.475913	0.697228	0.773499	0.620956	0.714499	0.79077	0.638227
658	0.614084	0.686753	0.541414	0.530389	0.603058	0.457719	0.684108	0.756777	0.611438
657	0.610371	0.684544	0.536198	0.557919	0.632092	0.483746	0.696906	0.771079	0.622733
656	0.65341	0.782021	0.575854	0.564129	0.69274	0.486573	0.727389	0.856	0.649833
655	0.672317	0.744607	0.600026	0.629836	0.702126	0.557545	0.680874	0.753164	0.608583
654	0.592766	0.670936	0.514595	0.697529	0.775699	0.619358	0.732995	0.811165	0.654824
653	0.659135	0.740746	0.577525	0.677631	0.759242	0.596021	0.762993	0.844604	0.681383
652	0.681693	0.750646	0.61274	0.503257	0.57221	0.434304	0.652243	0.721196	0.58329
651	0.724008	0.794566	0.653449	0.589909	0.660467	0.51935	0.666781	0.737339	0.596222
650	0.536868	0.60935	0.464386	0.57458	0.647062	0.502098	0.683853	0.756335	0.611371
649	0.621436	0.777438	0.541992	0.701457	0.857459	0.622013	0.745228	0.90123	0.665784
648	0.711853	0.788741	0.59097	0.544644	0.621532	0.423761	0.723183	0.800071	0.6023
647	0.760146	0.833636	0.686657	0.503745	0.577235	0.430256	0.693105	0.766595	0.619616
646	0.534918	0.609013	0.437437	0.561946	0.636041	0.464465	0.698711	0.772806	0.60123
645	0.629164	0.711131	0.547197	0.541092	0.623059	0.459125	0.767671	0.849638	0.685704
644	0.523491	0.662055	0.442166	0.468546	0.60711	0.387221	0.76267	0.901234	0.681345
643	0.609133	0.681963	0.536304	0.815206	0.888036	0.742377	0.688082	0.760912	0.615253
642	0.552137	0.614632	0.489643	0.457857	0.520352	0.395363	0.595538	0.658033	0.533044
641	0.545096	0.625599	0.464593	0.689104	0.769607	0.608601	0.754078	0.834581	0.673575
640	0.488852	0.569433	0.40827	0.660637	0.741218	0.580055	0.754998	0.835579	0.674416
639	0.69528	0.761548	0.629012	0.804878	0.871146	0.73861	0.629372	0.69564	0.563104
638	0.571558	0.640688	0.502428	0.810373	0.879503	0.741243	0.656696	0.725826	0.587566
637	0.797487	1.07399	0.718234	0.608652	0.885159	0.529399	0.746493	1.023	0.66724
636	0.686405	0.758164	0.614646	0.595851	0.66761	0.524092	0.679482	0.751241	0.607723
635	0.697442	0.768525	0.626359	0.567216	0.638299	0.496133	0.673104	0.744187	0.602021
634	0.449964	0.533012	0.366916	0.627692	0.71074	0.544644	0.777617	0.860665	0.694569
633	0.640177	0.859148	0.478748	0.644436	0.863407	0.483007	0.693429	0.9124	0.532
632	0.546425	0.835065	0.478694	0.892915	0.918155	0.825184	0.64376	0.9324	0.576029
631	0.663335	0.741145	0.585525	0.6745	0.75231	0.59669	0.734677	0.812487	0.656867
630	0.631283	0.7051	0.557465	0.639884	0.713701	0.566066	0.700034	0.773851	0.626216
629	0.623653	0.6986	0.548707	0.675591	0.750538	0.600645	0.709951	0.784898	0.635005
628	0.641251	0.710469	0.447464	0.876989	0.946207	0.683202	0.659087	0.728305	0.4653
627	0.584708	0.663896	0.505519	0.871968	0.951156	0.792779	0.748222	0.82741	0.669033
626	0.848205	1.09079	0.993913	0.465596	0.708184	0.611304	0.738642	0.98123	0.88435
625	0.673203	0.750076	0.59633	0.705627	0.7825	0.628754	0.727182	0.804055	0.650309
624	0.568716	0.649087	0.488346	0.617382	0.697753	0.537012	0.757766	0.838137	0.677396
623	0.513308	0.778805	0.629565	0.562655	0.828152	0.678912	0.817743	1.08324	0.934
622	0.646995	0.723754	0.570237	0.80587	0.882629	0.729112	0.72503	0.801789	0.648272
621	0.631759	0.701914	0.561605	0.519478	0.589633	0.449324	0.665628	0.735783	0.595474
620	0.582546	0.649412	0.51568	0.708951	0.775817	0.642085	0.636149	0.703015	0.569283
619	0.649518	0.719207	0.579828	0.548331	0.61802	0.478641	0.66075	0.730439	0.59106
618	0.707234	0.848971	0.632873	0.467406	0.609143	0.393045	0.701463	0.8432	0.627102
617	0.707752	0.784277	0.511493	0.730451	0.806976	0.534192	0.719759	0.796284	0.5235
616	0.626474	0.698462	0.554486	0.414309	0.486297	0.342321	0.67954	0.751528	0.607552
615	0.631479	0.702087	0.560872	0.829856	0.900464	0.759249	0.666218	0.736826	0.595611
614	0.647592	0.717844	0.57734	0.594746	0.664998	0.524494	0.663128	0.73338	0.592876
613	0.561173	0.638133	0.484214	0.493531	0.570491	0.416572	0.719763	0.796723	0.642804
612	0.628603	0.699449	0.557758	0.436163	0.507009	0.365318	0.666918	0.737764	0.596073
611	0.625325	0.702944	0.547706	0.456547	0.534166	0.378928	0.724368	0.801987	0.646749
610	0.585976	0.659062	0.512889	0.700821	0.773907	0.627734	0.6846	0.757686	0.611513
609	0.579603	0.647999	0.511207	0.653725	0.722121	0.585329	0.642473	0.710869	0.574077
608	0.563362	0.638555	0.48817	0.577354	0.652547	0.502162	0.700449	0.775642	0.625257
607	0.569595	0.636197	0.502993	0.530496	0.597098	0.463894	0.626069	0.692671	0.559467
606	0.544121	0.605742	0.4825	0.670669	0.73229	0.609048	0.581234	0.642855	0.519613
605	0.414656	0.489604	0.339707	0.711697	0.786645	0.636748	0.694352	0.7693	0.619403
604	0.597848	0.66978	0.525915	0.616479	0.688411	0.544546	0.668812	0.740744	0.596879
603	0.562593	0.631225	0.493962	0.579379	0.648011	0.510748	0.639031	0.707663	0.5704
602	0.636724	0.717279	0.556169	0.326756	0.407311	0.246201	0.73629	0.816845	0.655735
601	0.668571	0.730524	0.606618	0.628001	0.689954	0.566048	0.579105	0.641058	0.517152
600	0.651825	0.71076	0.52232	0.518981	0.577916	0.389476	0.552505	0.61144	0.423
599	0.613714	0.942299	0.541253	0.672093	1.00068	0.599632	0.661915	0.9905	0.589454
598	0.583052	0.653572	0.512531	0.498787	0.569307	0.428266	0.646863	0.717383	0.576342
597	0.540829	0.618014	0.463645	0.721743	0.798928	0.644559	0.69186	0.769045	0.614676
596	0.59912	0.649321	0.548919	0.560925	0.611126	0.510724	0.471661	0.521862	0.42146
595	0.54229	0.609626	0.474954	0.615833	0.683169	0.548497	0.615288	0.682624	0.547952
594	0.542917	0.611495	0.474338	0.700821	0.769399	0.632242	0.615491	0.684069	0.546912
593	0.591609	0.669894	0.513324	0.653725	0.73201	0.57544	0.686569	0.764854	0.608284
592	0.592766	0.667228	0.518304	0.577354	0.651816	0.502892	0.649981	0.724443	0.575519
591	0.659135	0.717365	0.600906	0.530496	0.588726	0.472267	0.532364	0.590594	0.474135
590	0.681693	0.862911	0.751711	0.670669	0.851887	0.740687	0.852982	1.0342	0.923
589	0.724008	0.816115	0.631902	0.711697	0.803804	0.619591	0.780714	0.872821	0.688608
588	0.536868	0.607647	0.46609	0.616479	0.687258	0.545701	0.624303	0.695082	0.553525
587	0.621436	0.703467	0.539404	0.579379	0.66141	0.497347	0.699083	0.781114	0.617051
586	0.711853	0.78478	0.58637	0.326756	0.399683	0.201273	0.629983	0.70291	0.5045
585	0.760146	0.838379	0.681912	0.628001	0.706234	0.549767	0.65714	0.735373	0.578906
584	0.651175	0.89026	0.4754	0.518981	0.758066	0.343206	0.684315	0.9234	0.50854
583	0.552185	0.634332	0.470039	0.672093	0.75424	0.589947	0.672135	0.754282	0.589989
582	0.614084	0.79151	0.58662	0.498787	0.676213	0.471323	0.594914	0.77234	0.56745
581	0.610371	0.668706	0.552037	0.721743	0.780078	0.663409	0.505959	0.564294	0.447625
580	0.65341	0.710955	0.595865	0.560925	0.61847	0.50338	0.496812	0.554357	0.439267
580	0.672317	0.853864	0.49077	0.615533	0.79708	0.433986	0.78934	0.970887	0.607793
579	0.592766	0.716303	0.469229	0.699901	0.823438	0.576364	0.775176	0.898713	0.651639
578	0.659135	0.820742	0.497528	0.617392	0.778999	0.455785	0.988653	1.15026	0.827046
577	0.681693	0.80911	0.554272	0.585774	0.713191	0.458353	0.882843	1.01026	0.755422
576	0.724008	0.896175	0.551843	0.687941	0.860108	0.515776	0.946243	1.11841	0.774078
575	0.536868	0.636883	0.436853	0.385217	0.485232	0.285202	0.732174	0.832189	0.632159
574	0.621436	0.736288	0.506584	0.708675	0.823527	0.593823	0.769057	0.883909	0.654205
573	0.711853	0.80725	0.616457	0.650072	0.745469	0.554676	0.793764	0.889161	0.698368
572	0.760238	0.880419	0.640057	0.665895	0.786076	0.545714	0.868208	0.988389	0.748027
571	0.881172	0.999842	0.762501	0.635211	0.753881	0.51654	0.832745	0.951415	0.714074
570	0.788636	0.883201	0.69407	0.663304	0.757869	0.568738	0.831009	0.925574	0.736443
569	0.833409	0.922493	0.744324	0.703652	0.792736	0.614567	0.71146	0.800544	0.622375
568	0.797931	0.885065	0.710796	0.562897	0.650031	0.475762	0.783718	0.870852	0.696583
567	0.686028	0.785075	0.586981	0.69269	0.791737	0.593643	0.717724	0.816771	0.618677
566	0.898549	1.01235	0.78475	0.615533	0.72933	0.501734	0.951373	1.06517	0.837574
565	0.622209	0.708048	0.53637	0.585774	0.671613	0.499935	0.754307	0.840146	0.668468
564	0.932498	1.01689	0.84811	0.687941	0.772328	0.603553	0.808372	0.892759	0.723984
563	0.783565	0.931031	0.636098	0.385217	0.532683	0.23775	0.80737	0.954836	0.659903
562	0.71451	0.795847	0.633172	0.708675	0.790012	0.627337	0.683219	0.764556	0.601881
561	0.546898	0.622769	0.471026	0.650072	0.725943	0.5742	0.728787	0.804658	0.652915
560	0.682918	0.757096	0.608741	0.665895	0.740072	0.591717	0.693305	0.767482	0.619127
559	0.640104	0.706045	0.574162	0.635211	0.701152	0.569269	0.622442	0.688383	0.5565
558	0.62608	0.702878	0.549281	0.663304	0.740102	0.586505	0.711687	0.788485	0.634888
557	0.662711	0.748187	0.577236	0.703652	0.789128	0.618177	0.802347	0.887823	0.716872
556	0.639787	0.725388	0.554186	0.562897	0.648498	0.477296	0.821571	0.907172	0.73597
555	0.696134	0.770925	0.621343	0.69269	0.767481	0.617899	0.698338	0.773129	0.623547
554	0.686394	0.755268	0.617521	0.615533	0.684407	0.54666	0.66718	0.736054	0.598307
553	0.688934	0.759184	0.618685	0.601705	0.671955	0.531456	0.664089	0.734339	0.59384
552	0.650263	0.740846	0.55968	0.734971	0.825554	0.644388	0.737907	0.82849	0.647324
551	0.668266	0.756104	0.580427	0.644241	0.732079	0.556402	0.779235	0.867073	0.691396
550	0.715345	0.80061	0.63008	0.698917	0.784182	0.613652	0.793827	0.879092	0.708562
549	0.690141	0.765925	0.614358	0.560409	0.636193	0.484626	0.690238	0.766022	0.614455
548	0.739193	0.809805	0.668582	0.68732	0.757932	0.616709	0.643289	0.713901	0.572678
547	0.681839	0.784148	0.579531	0.708124	0.810433	0.605816	0.752582	0.854891	0.650274
546	0.641879	0.847713	0.436045	0.600628	0.806462	0.394794	0.762698	0.968532	0.556864
545	0.599749	0.680441	0.519058	0.668317	0.749009	0.587626	0.708115	0.788807	0.627424
544	0.673898	0.8188	0.528996	0.806625	0.951527	0.661723	0.74136	0.886262	0.596458
543	0.732543	0.7934	0.991088	0.595658	0.715441	0.475876	0.819575	0.939358	0.699793
542	0.664884	0.735408	0.59436	0.742684	0.813208	0.67216	0.635132	0.705656	0.564608
541	0.593932	0.685711	0.502153	0.685109	0.776888	0.59333	0.753598	0.845377	0.661819
540	0.700206	0.779484	0.620927	0.603627	0.682905	0.524348	0.629237	0.708515	0.549958
539	0.77336	0.865017	0.681704	0.584914	0.676571	0.493258	0.734693	0.82635	0.643037
538	0.596331	0.689451	0.503211	0.668935	0.762055	0.575815	0.780061	0.873181	0.686941
537	0.772197	0.873351	0.671043	0.625488	0.726642	0.524334	0.714347	0.815501	0.613193
536	0.732244	0.812166	0.652322	0.761258	0.84118	0.681336	0.696819	0.776741	0.616897
535	0.677257	0.751525	0.602988	0.835147	0.909415	0.760878	0.627558	0.701826	0.553289
534	0.695178	0.78754	0.602816	0.703652	0.796014	0.61129	0.758756	0.851118	0.666394
533	0.631916	0.71039	0.553442	0.562897	0.641371	0.484423	0.672752	0.751226	0.594278
532	0.817148	0.906275	0.728021	0.69269	0.781817	0.603563	0.691604	0.780731	0.602477
531	0.588107	0.675747	0.500467	0.615533	0.703173	0.527893	0.673884	0.761524	0.586244
530	0.650459	0.736866	0.564052	0.601705	0.688112	0.515298	0.737282	0.823689	0.650875
529	0.666855	0.748728	0.584983	0.734971	0.816844	0.653099	0.74743	0.829303	0.665558
528	0.64146	0.735931	0.54699	0.644241	0.738712	0.549771	0.775885	0.870356	0.681415
527	0.67973	0.761204	0.598256	0.698917	0.780391	0.617443	0.657547	0.739021	0.576073
526	0.59986	0.68584	0.513879	0.560409	0.646389	0.474428	0.730008	0.815988	0.644027
525	0.621202	0.739074	0.503329	0.68732	0.805192	0.569447	0.68332	0.801192	0.565447
524	0.687448	0.767528	0.607368	0.708124	0.788204	0.628044	0.693938	0.774018	0.613858
523	0.647206	0.73868	0.555732	0.600628	0.692102	0.509154	0.732066	0.82354	0.640592
522	0.673627	0.772075	0.575178	0.668317	0.766765	0.569868	0.772622	0.87107	0.674173
521	0.651637	0.746011	0.557263	0.806625	0.900999	0.712251	0.799334	0.893708	0.70496
520	0.642348	0.727378	0.557318	0.595658	0.680688	0.510628	0.736021	0.821051	0.650991
519	0.643327	0.771758	0.514896	0.742684	0.871115	0.614253	0.780762	0.909193	0.652331
518	0.658913	0.739186	0.578639	0.685109	0.765382	0.604835	0.676903	0.757176	0.596629
517	0.814426	0.912117	0.716734	0.603627	0.701318	0.505935	0.813913	0.911604	0.716221
516	0.684713	0.777294	0.592132	0.584914	0.677495	0.492333	0.699123	0.791704	0.606542
515	0.639469	0.718032	0.560906	0.668935	0.747498	0.590372	0.708796	0.787359	0.630233
514	0.615651	0.699278	0.532023	0.625488	0.709115	0.54186	0.703776	0.787403	0.620148
513	0.629089	0.703491	0.554688	0.761258	0.83566	0.686857	0.668265	0.742667	0.593864
512	0.614406	0.692958	0.535853	0.835147	0.913699	0.756594	0.710717	0.789269	0.632164
511	0.669018	0.785981	0.552055	0.572474	0.689437	0.455511	0.766775	0.883738	0.649812
510	0.629331	0.764983	0.493678	0.853446	0.989098	0.717793	0.79931	0.934962	0.663657
509	0.611904	0.698498	0.525309	0.640243	0.726837	0.553648	0.721843	0.808437	0.635248
508	0.640075	0.706277	0.573873	0.633678	0.69988	0.567476	0.5925	0.658702	0.526298
507	0.666475	0.737311	0.59564	0.63214	0.702976	0.561305	0.650891	0.721727	0.580056
506	0.679848	0.757273	0.602424	0.654	0.731425	0.576576	0.684173	0.761598	0.606749
505	0.57232	0.6574	0.48724	0.7345	0.81958	0.64942	0.776738	0.861818	0.691658
504	0.64134	0.72412	0.55856	0.617805	0.700585	0.535025	0.761847	0.844627	0.679067
503	0.651382	0.7364	0.566364	0.646341	0.731359	0.561323	0.795668	0.880686	0.71065
502	0.71517	0.791551	0.63879	0.6784	0.754781	0.60202	0.702957	0.779338	0.626577
501	0.671879	0.75604	0.587719	0.6732	0.757361	0.58904	0.736603	0.820764	0.652443
500	0.690329	0.780881	0.599778	0.570744	0.661296	0.480193	0.739801	0.830353	0.64925

## Sheet: Smoldering-500
WL	CS_500	CS+Error_500	CS-Error_500	RS_500	RS+Error_500	RS-Error_500	WS-500	WS+Error_500	WS-Error_500
660	0.429345	0.474666	0.40234	0.633514	0.697835	0.60234	0.726552	0.790873	0.67012
659	0.579097	0.624418	0.383713	0.62761	0.691931	0.579222	0.73585	0.800171	0.679418
658	0.420117	0.465438	0.533465	0.810854	0.875175	0.573318	0.808205	0.872526	0.751773
657	0.580818	0.626139	0.374485	0.61371	0.678031	0.756561	0.621179	0.6855	0.564747
656	0.552662	0.597983	0.535186	0.769403	0.833724	0.559417	0.866607	0.930928	0.810175
655	0.496747	0.542068	0.50703	0.63638	0.700701	0.71511	0.728398	0.792719	0.671966
654	0.45801	0.503331	0.451115	0.805163	0.869484	0.582088	0.678644	0.742965	0.622212
653	0.583115	0.628436	0.412378	0.751625	0.815946	0.750871	0.615234	0.679555	0.558802
652	0.653077	0.698398	0.537483	0.628571	0.692892	0.697333	0.715523	0.779844	0.659091
651	0.588464	0.633784	0.607445	0.731259	0.79558	0.574279	0.726552	0.790873	0.67012
650	0.599508	0.644829	0.542832	0.666113	0.730434	0.676966	0.73585	0.800171	0.679418
649	0.487697	0.533018	0.553876	0.725992	0.790313	0.611821	0.808205	0.872526	0.751773
648	0.533084	0.578405	0.442065	0.596606	0.660927	0.671699	0.621179	0.6855	0.564747
647	0.433475	0.478796	0.487452	0.719916	0.784237	0.542313	0.866607	0.930928	0.810175
646	0.509535	0.554856	0.387843	0.571521	0.635842	0.665624	0.728398	0.792719	0.671966
645	0.662261	0.707582	0.463903	0.807732	0.872053	0.517229	0.678644	0.742965	0.622212
644	0.44572	0.491041	0.616629	0.604958	0.669279	0.75344	0.615234	0.679555	0.558802
643	0.418338	0.463659	0.400088	0.743308	0.807629	0.550665	0.715523	0.779844	0.659091
642	0.374908	0.420229	0.372706	0.799391	0.863712	0.689016	0.808205	0.872526	0.751773
641	0.30165	0.346971	0.329276	0.598223	0.662544	0.745098	0.621179	0.6855	0.564747
640	0.419777	0.465098	0.256018	0.682111	0.746432	0.543931	0.866607	0.930928	0.810175
639	0.429345	0.474666	0.374145	0.630239	0.69456	0.627818	0.728398	0.792719	0.671966
638	0.579097	0.624418	0.383713	0.800175	0.864496	0.575947	0.678644	0.742965	0.622212
637	0.420117	0.465438	0.533465	0.623742	0.688063	0.745882	0.615234	0.679555	0.558802
636	0.580818	0.626139	0.374485	0.730205	0.794526	0.56945	0.715523	0.779844	0.659091
635	0.552662	0.597983	0.535186	0.624673	0.688994	0.675913	0.723282	0.787603	0.66685
634	0.496747	0.542068	0.50703	0.680594	0.744915	0.570381	0.722086	0.786407	0.665654
633	0.45801	0.503331	0.451115	0.743455	0.807776	0.626301	0.764527	0.828848	0.708095
632	0.583115	0.628436	0.412378	0.803062	0.867383	0.689163	0.761422	0.825743	0.70499
631	0.429345	0.474666	0.537483	0.590861	0.655182	0.74877	0.686458	0.750779	0.630026
630	0.579097	0.624418	0.383713	0.721481	0.785802	0.536568	0.662128	0.726449	0.605696
629	0.420117	0.465438	0.533465	0.941408	1.00573	0.667189	0.62052	0.684841	0.564088
628	0.580818	0.626139	0.374485	0.726439	0.79076	0.887116	0.794754	0.859075	0.738322
627	0.552662	0.597983	0.535186	0.610919	0.67524	0.672146	0.773092	0.837413	0.71666
626	0.496747	0.542068	0.50703	0.680558	0.744879	0.556627	0.662246	0.726567	0.605814
625	0.45801	0.503331	0.451115	0.70481	0.769131	0.626265	0.702005	0.766326	0.645573
624	0.583115	0.628436	0.412378	0.631143	0.695464	0.650518	0.742308	0.806629	0.685876
623	0.530548	0.575869	0.537483	0.634573	0.698894	0.57685	0.696778	0.761099	0.640346
622	0.687002	0.732323	0.484916	0.748917	0.813238	0.58028	0.569827	0.634148	0.513395
621	0.529483	0.574804	0.64137	0.762672	0.826993	0.694625	0.537485	0.601806	0.481053
620	0.510657	0.555978	0.483851	0.635693	0.700014	0.708379	0.643152	0.707473	0.58672
619	0.445243	0.490564	0.465025	0.827074	0.891395	0.5814	0.71577	0.780091	0.659338
618	0.52966	0.574981	0.399611	0.629941	0.694262	0.772781	0.763412	0.827733	0.70698
617	0.464431	0.509752	0.484028	0.658325	0.722646	0.575649	0.640242	0.704563	0.58381
616	0.472696	0.518017	0.418799	0.606116	0.670437	0.604032	0.502515	0.566836	0.446083
615	0.553518	0.598839	0.427064	0.647358	0.711679	0.551823	0.691064	0.755385	0.634632
614	0.505279	0.5506	0.507886	0.666226	0.730547	0.593065	0.599058	0.663379	0.542626
613	0.429345	0.474666	0.459647	0.686984	0.751305	0.611934	0.564208	0.628529	0.507776
612	0.579097	0.624418	0.383713	0.686343	0.750664	0.632691	0.657488	0.721809	0.601056
611	0.420117	0.465438	0.533465	0.598342	0.662663	0.63205	0.689172	0.753493	0.63274
610	0.580818	0.626139	0.374485	0.639814	0.704135	0.54405	0.690858	0.755179	0.634426
609	0.552662	0.597983	0.535186	0.614685	0.679006	0.585521	0.636933	0.701254	0.580501
608	0.496747	0.542068	0.50703	0.559214	0.623535	0.560392	0.649925	0.714246	0.593493
607	0.45801	0.503331	0.451115	0.64586	0.710181	0.504921	0.574403	0.638724	0.517971
606	0.583115	0.628436	0.412378	0.590308	0.654629	0.591568	0.600388	0.664709	0.543956
605	0.429345	0.474666	0.537483	0.643082	0.707403	0.536015	0.629184	0.693505	0.572752
604	0.579097	0.624418	0.383713	0.521747	0.586068	0.58879	0.735623	0.799944	0.679191
603	0.420117	0.465438	0.533465	0.666226	0.730547	0.467455	0.653375	0.717696	0.596943
602	0.580818	0.626139	0.374485	0.686984	0.751305	0.611934	0.55683	0.621151	0.500398
601	0.552662	0.597983	0.535186	0.686343	0.750664	0.632691	0.609083	0.673404	0.552651
600	0.496747	0.542068	0.50703	0.598342	0.662663	0.63205	0.653414	0.717735	0.596982
599	0.45801	0.503331	0.451115	0.639814	0.704135	0.54405	0.657488	0.721809	0.601056
598	0.583115	0.628436	0.412378	0.614685	0.679006	0.585521	0.689172	0.753493	0.63274
597	0.429345	0.474666	0.537483	0.559214	0.623535	0.560392	0.690858	0.755179	0.634426
596	0.579097	0.624418	0.383713	0.64586	0.710181	0.504921	0.636933	0.701254	0.580501
595	0.420117	0.465438	0.533465	0.590308	0.654629	0.591568	0.649925	0.714246	0.593493
594	0.580818	0.626139	0.374485	0.643082	0.707403	0.536015	0.574403	0.638724	0.517971
593	0.552662	0.597983	0.535186	0.521747	0.586068	0.58879	0.600388	0.664709	0.543956
592	0.496747	0.542068	0.50703	0.666226	0.730547	0.467455	0.629184	0.693505	0.572752
591	0.45801	0.503331	0.451115	0.686984	0.751305	0.611934	0.735623	0.799944	0.679191
590	0.583115	0.628436	0.412378	0.686343	0.750664	0.632691	0.653375	0.717696	0.596943
589	0.407025	0.452346	0.537483	0.598342	0.662663	0.63205	0.55683	0.621151	0.500398
588	0.456574	0.501895	0.361393	0.639814	0.704135	0.54405	0.609083	0.673404	0.552651
587	0.436515	0.50471	0.40942	0.614685	0.679006	0.585521	0.653414	0.717735	0.596982
586	0.519324	0.564645	0.319518	0.559214	0.623535	0.560392	0.657488	0.721809	0.601056
585	0.535663	0.580984	0.473692	0.64586	0.710181	0.504921	0.689172	0.753493	0.63274
584	0.597322	0.642643	0.490031	0.590308	0.654629	0.591568	0.690858	0.755179	0.634426
583	0.551284	0.596605	0.55169	0.643082	0.707403	0.536015	0.636933	0.701254	0.580501
582	0.60866	0.653192	0.550565	0.666226	0.730547	0.58879	0.649925	0.714246	0.593493
581	0.495253	0.540574	0.440972	0.686984	0.751305	0.611934	0.574403	0.638724	0.517971
580	0.608368	0.653689	0.549621	0.779025	0.843346	0.632691	0.600388	0.664709	0.543956
580	0.541992	0.587313	0.562736	0.793325	0.857646	0.724732	0.629184	0.693505	0.572752
579	0.475397	0.547072	0.44636	0.72072	0.785041	0.739033	0.735623	0.799944	0.679191
578	0.436911	0.482232	0.379765	0.823058	0.887379	0.666428	0.653375	0.717696	0.596943
577	0.411885	0.457206	0.391279	0.620521	0.684842	0.768765	0.55683	0.621151	0.500398
576	0.4512	0.496521	0.366253	0.758093	0.822414	0.566229	0.609083	0.673404	0.552651
575	0.429245	0.474566	0.405568	0.777971	0.842292	0.7038	0.653414	0.717735	0.596982
574	0.432099	0.47742	0.383613	0.805888	0.870209	0.723678	0.769057	0.833378	0.712625
573	0.527723	0.573044	0.386467	0.712824	0.777145	0.751596	0.793764	0.858085	0.737332
572	0.495717	0.541038	0.482091	0.658368	0.722689	0.658531	0.868208	0.932529	0.811776
571	0.524922	0.570243	0.450085	0.690444	0.754765	0.604076	0.832745	0.897066	0.776313
570	0.467039	0.51236	0.47929	0.655776	0.720097	0.636152	0.831009	0.89533	0.774577
569	0.541992	0.587313	0.421407	0.743689	0.80801	0.601484	0.71146	0.775781	0.655028
568	0.425397	0.470718	0.49636	0.657296	0.721617	0.689396	0.783718	0.848039	0.727286
567	0.436911	0.482232	0.379765	0.761548	0.825869	0.603003	0.717724	0.782045	0.661292
566	0.411885	0.457206	0.391279	0.659759	0.72408	0.707256	0.951373	1.01569	0.894941
565	0.4512	0.496521	0.366253	0.700005	0.764326	0.605467	0.754307	0.818628	0.697875
564	0.429245	0.474566	0.405568	0.607086	0.671407	0.645713	0.808372	0.872693	0.75194
563	0.432099	0.47742	0.383613	0.904253	0.968574	0.552793	0.80737	0.871691	0.750938
562	0.527723	0.573044	0.386467	0.701533	0.765854	0.84996	0.683219	0.74754	0.626787
561	0.495717	0.541038	0.482091	0.735909	0.80023	0.64724	0.728787	0.793108	0.672355
560	0.524922	0.570243	0.450085	0.507869	0.57219	0.681616	0.693305	0.757626	0.636873
559	0.467039	0.51236	0.47929	0.659069	0.72339	0.453577	0.622442	0.686763	0.56601
558	0.47509	0.520411	0.421407	0.719733	0.784054	0.604777	0.711687	0.776008	0.655255
557	0.432099	0.47742	0.429458	0.794197	0.858518	0.665441	0.802347	0.866668	0.745915
556	0.527723	0.573044	0.386467	0.710658	0.774979	0.739904	0.821571	0.885892	0.765139
555	0.495717	0.541038	0.482091	0.734866	0.799187	0.656365	0.698338	0.762659	0.641906
554	0.524922	0.570243	0.450085	0.780168	0.844489	0.680573	0.66718	0.731501	0.610748
553	0.467039	0.51236	0.47929	0.815637	0.879958	0.725875	0.664089	0.72841	0.607657
552	0.47509	0.520411	0.421407	0.754778	0.819099	0.761344	0.737907	0.802228	0.681475
551	0.541992	0.587313	0.429458	0.793877	0.858198	0.700485	0.779235	0.843556	0.722803
550	0.425397	0.470718	0.49636	0.753497	0.817818	0.739585	0.793827	0.858148	0.737395
549	0.436911	0.482232	0.379765	0.678719	0.74304	0.699204	0.690238	0.754559	0.633806
548	0.411885	0.457206	0.391279	0.7959	0.860221	0.624427	0.643289	0.70761	0.586857
547	0.4512	0.496521	0.366253	0.659759	0.72408	0.741607	0.752582	0.816903	0.69615
546	0.429245	0.474566	0.405568	0.700005	0.764326	0.605467	0.762698	0.827019	0.706266
545	0.432099	0.47742	0.383613	0.607086	0.671407	0.645713	0.708115	0.772436	0.651683
544	0.527723	0.573044	0.386467	0.904253	0.968574	0.552793	0.74136	0.805681	0.684928
543	0.495717	0.541038	0.482091	0.701533	0.765854	0.84996	0.819575	0.883896	0.763143
542	0.524922	0.570243	0.450085	0.735909	0.80023	0.64724	0.635132	0.699453	0.5787
541	0.467039	0.51236	0.47929	0.507869	0.57219	0.681616	0.753598	0.817919	0.697166
540	0.47509	0.520411	0.421407	0.659069	0.72339	0.453577	0.629237	0.693558	0.572805
539	0.362544	0.407865	0.429458	0.719733	0.784054	0.604777	0.734693	0.799014	0.678261
538	0.449007	0.494328	0.316912	0.794197	0.858518	0.665441	0.780061	0.844382	0.723629
537	0.483387	0.528708	0.403375	0.710658	0.774979	0.739904	0.714347	0.778668	0.657915
536	0.446489	0.49181	0.437755	0.734866	0.799187	0.656365	0.696819	0.76114	0.640387
535	0.571168	0.616489	0.400857	0.780168	0.844489	0.680573	0.627558	0.691879	0.571126
534	0.481244	0.526565	0.525536	0.815637	0.879958	0.725875	0.758756	0.823077	0.702324
533	0.545454	0.590775	0.435612	0.754778	0.819099	0.761344	0.672752	0.737073	0.61632
532	0.469431	0.514752	0.499822	0.793877	0.858198	0.700485	0.691604	0.755925	0.635172
531	0.469265	0.514586	0.423799	0.753497	0.817818	0.739585	0.673884	0.738205	0.617452
530	0.473247	0.518568	0.423633	0.678719	0.74304	0.699204	0.737282	0.801603	0.68085
529	0.490257	0.535578	0.427615	0.7959	0.860221	0.624427	0.74743	0.811751	0.690998
528	0.514938	0.560259	0.444625	0.782663	0.846984	0.741607	0.775885	0.840206	0.719453
527	0.540835	0.586156	0.469306	0.724554	0.788875	0.72837	0.657547	0.721868	0.601115
526	0.535545	0.580866	0.495203	0.702608	0.766929	0.670261	0.730008	0.794329	0.673576
525	0.493501	0.538822	0.489913	0.699868	0.764189	0.648315	0.68332	0.747641	0.626888
524	0.496725	0.542046	0.447869	0.762559	0.82688	0.645575	0.693938	0.758259	0.637506
523	0.540825	0.586146	0.451093	0.647476	0.711797	0.708266	0.732066	0.796387	0.675634
522	0.501189	0.54651	0.495193	0.729374	0.793695	0.593183	0.772622	0.836943	0.71619
521	0.528928	0.574249	0.455557	0.80676	0.871081	0.675081	0.799334	0.863655	0.742902
520	0.465157	0.510478	0.483296	0.855328	0.919649	0.752467	0.736021	0.800342	0.679589
519	0.517545	0.562866	0.419525	0.664171	0.728492	0.801035	0.780762	0.845083	0.72433
518	0.446489	0.49181	0.471913	0.708465	0.772786	0.609878	0.676903	0.741224	0.620471
517	0.571168	0.616489	0.400857	0.775334	0.839655	0.654173	0.813913	0.878234	0.757481
516	0.481244	0.526565	0.525536	0.776503	0.840824	0.721042	0.699123	0.763444	0.642691
515	0.545454	0.590775	0.435612	0.749739	0.81406	0.722211	0.708796	0.773117	0.652364
514	0.469431	0.514752	0.499822	0.779724	0.844045	0.695446	0.703776	0.768097	0.647344
513	0.469265	0.514586	0.423799	0.728252	0.792573	0.725432	0.668265	0.732586	0.611833
512	0.473247	0.518568	0.423633	0.666263	0.730584	0.673959	0.710717	0.775038	0.654285
511	0.490257	0.535578	0.427615	0.816346	0.880667	0.61197	0.766775	0.831096	0.710343
510	0.514938	0.560259	0.444625	0.777147	0.841468	0.762053	0.79931	0.863631	0.742878
509	0.540835	0.586156	0.469306	0.874784	0.939105	0.722854	0.721843	0.786164	0.665411
508	0.535545	0.580866	0.495203	0.70391	0.768231	0.820491	0.5925	0.656821	0.536068
507	0.493501	0.538822	0.489913	0.667211	0.731532	0.649618	0.650891	0.715212	0.594459
506	0.496725	0.542046	0.447869	0.854388	0.918709	0.612919	0.684173	0.748494	0.627741
505	0.540825	0.586146	0.451093	0.720805	0.785126	0.800095	0.776738	0.841059	0.720306
504	0.501189	0.54651	0.495193	0.708117	0.772438	0.666513	0.761847	0.826168	0.705415
503	0.528928	0.574249	0.455557	0.814635	0.878956	0.653825	0.795668	0.859989	0.739236
502	0.465157	0.510478	0.483296	0.573644	0.637965	0.760343	0.702957	0.767278	0.646525
501	0.517545	0.562866	0.419525	0.62625	0.690571	0.519351	0.736603	0.800924	0.680171
500	0.54476	0.590081	0.471913	0.68432	0.748641	0.571957	0.739801	0.804122	0.683369

## Sheet: Flaming-400
WL	CF_400	CF+Error_400	CF-Error_400	RF_400	RF+Error_400	RF-Error_400	WF-400	WF+Error_400	WF-Error
660	0.59	0.639998	0.540002	0.560265	0.592322	0.528207	0.5123	0.563432	0.461168
659	0.57	0.613722	0.526278	0.48293	0.524973	0.440887	0.5321	0.61661	0.44759
658	0.59	0.639073	0.540927	0.54947	0.599744	0.499196	0.50234	0.582581	0.422099
657	0.57	0.616553	0.523447	0.534326	0.571878	0.496774	0.512345	0.568539	0.456151
656	0.56	0.608299	0.511701	0.622381	0.658353	0.586409	0.521344	0.567616	0.475072
655	0.54	0.57163	0.50837	0.566727	0.601807	0.531647	0.532768	0.582718	0.482818
654	0.56	0.590233	0.529767	0.595637	0.632496	0.558778	0.54378	0.595989	0.491571
653	0.57	0.599585	0.540415	0.620349	0.654784	0.585914	0.55342	0.594777	0.512063
652	0.58	0.61163	0.54837	0.577937	0.607459	0.548415	0.56957	0.606666	0.532474
651	0.57	0.600233	0.539767	0.578453	0.60717	0.549736	0.537132	0.566335	0.507929
650	0.57	0.599585	0.540415	0.647654	0.690773	0.604535	0.585692	0.63267	0.538714
649	0.57	0.596789	0.543211	0.572777	0.601171	0.544383	0.545155	0.57024	0.52007
648	0.6	0.637474	0.562526	0.605462	0.641926	0.568998	0.555201	0.586911	0.523491
647	0.56	0.59163	0.52837	0.64243	0.684924	0.599936	0.452719	0.479191	0.426247
646	0.57	0.600233	0.539767	0.50486	0.527049	0.482671	0.506696	0.531735	0.481657
645	0.54	0.569585	0.510415	0.592314	0.63203	0.552598	0.5812	0.620489	0.541911
644	0.57	0.618344	0.521656	0.638683	0.676718	0.600648	0.507409	0.536756	0.478062
643	0.56	0.59445	0.52555	0.640437	0.669959	0.610915	0.59764	0.632529	0.562751
642	0.56	0.615122	0.504878	0.523797	0.552514	0.49508	0.637976	0.669323	0.582723
641	0.6	0.665913	0.534087	0.564969	0.608088	0.52185	0.509238	0.559011	0.459465
640	0.57	0.603774	0.536226	0.606262	0.634656	0.577868	0.433412	0.457732	0.409092
639	0.56	0.576197	0.543803	0.540503	0.576967	0.504039	0.549398	0.575804	0.522992
638	0.58	0.624155	0.535845	0.655478	0.67282	0.638136	0.566254	0.58047	0.552038
637	0.56	0.597291	0.522709	0.531511	0.548883	0.514139	0.5123	0.526276	0.498324
636	0.57	0.589	0.551	0.565606	0.584316	0.546896	0.5321	0.548344	0.515856
635	0.57	0.59545	0.54455	0.596509	0.626652	0.566366	0.50234	0.5229	0.48178
634	0.59	0.611986	0.568014	0.623871	0.657691	0.590051	0.512345	0.533586	0.491104
633	0.58	0.600013	0.559987	0.658023	0.697353	0.618693	0.521344	0.547784	0.494904
632	0.58	0.604934	0.555066	0.592715	0.621327	0.564103	0.532768	0.553429	0.512107
631	0.58	0.604097	0.555903	0.621474	0.687005	0.555943	0.54378	0.588034	0.499526
630	0.57	0.592274	0.547726	0.593845	0.622884	0.564806	0.55342	0.574901	0.531939
629	0.55	0.567214	0.532786	0.649885	0.68508	0.61469	0.56957	0.592759	0.546381
628	0.57	0.591693	0.548307	0.63587	0.674662	0.597078	0.537132	0.561087	0.513177
627	0.6	0.696523	0.503477	0.597479	0.615944	0.579014	0.585692	0.602527	0.568857
626	0.58	0.604604	0.555396	0.635733	0.673212	0.598254	0.545155	0.571032	0.519278
625	0.55	0.569458	0.530542	0.647265	0.686573	0.607957	0.555201	0.580052	0.53035
624	0.58	0.59974	0.56026	0.563017	0.611684	0.51435	0.452719	0.47892	0.426518
623	0.57	0.60043	0.53957	0.588579	0.610044	0.567114	0.506696	0.520704	0.492688
622	0.58	0.602231	0.557769	0.60809	0.633482	0.582698	0.5812	0.60465	0.55775
621	0.58	0.611233	0.548767	0.605259	0.629469	0.581049	0.507409	0.528579	0.486239
620	0.56	0.580015	0.539985	0.630531	0.659749	0.601313	0.59764	0.620461	0.574819
619	0.58	0.601748	0.558252	0.57103	0.624113	0.517947	0.637976	0.677133	0.598819
618	0.56	0.576498	0.543502	0.674055	0.721995	0.626115	0.509238	0.534526	0.48395
617	0.57	0.587627	0.552373	0.616826	0.656636	0.577015	0.433412	0.452244	0.41458
616	0.58	0.602057	0.557943	0.665576	0.695098	0.636054	0.549398	0.70791	0.390886
615	0.57	0.593157	0.546843	0.627196	0.655912	0.598479	0.566254	0.597574	0.534934
614	0.57	0.590105	0.549895	0.606654	0.649773	0.563535	0.5123	0.53645	0.48815
613	0.56	0.580832	0.539168	0.609323	0.637717	0.580929	0.5321	0.555317	0.508883
612	0.57	0.626456	0.513544	0.553766	0.59023	0.517302	0.50234	0.526709	0.477971
611	0.57	0.587382	0.552618	0.603019	0.631473	0.574565	0.512345	0.53069	0.494
610	0.61	0.63415	0.58585	0.64671	0.67577	0.61765	0.521344	0.541744	0.500944
609	0.58	0.596717	0.563283	0.601017	0.633823	0.568211	0.532768	0.551048	0.514488
608	0.59	0.609498	0.570502	0.594489	0.62428	0.564698	0.54378	0.566908	0.520652
607	0.57	0.594617	0.545383	0.579045	0.622093	0.535997	0.55342	0.582292	0.524548
606	0.57	0.593954	0.546046	0.640835	0.668142	0.613528	0.56957	0.588494	0.550646
605	0.57	0.602476	0.537524	0.587468	0.606343	0.568593	0.537132	0.550407	0.523857
604	0.59	0.618338	0.561662	0.59391	0.61613	0.57169	0.585692	0.602672	0.568712
603	0.57	0.586107	0.553893	0.641532	0.679972	0.603092	0.545155	0.567877	0.522433
602	0.58	0.61379	0.54621	0.637041	0.687461	0.586621	0.555201	0.585715	0.524687
601	0.56	0.591606	0.528394	0.548796	0.579961	0.517631	0.452719	0.472039	0.433399
600	0.56	0.583155	0.536845	0.598891	0.628413	0.569369	0.506696	0.557689	0.455703
599	0.57	0.599589	0.540411	0.611479	0.640196	0.582762	0.5812	0.609624	0.552776
598	0.59	0.663523	0.516477	0.594075	0.637194	0.550956	0.507409	0.542254	0.472564
597	0.58	0.614073	0.545927	0.626515	0.654909	0.598121	0.59764	0.63694	0.563159
596	0.56	0.582182	0.537818	0.57405	0.610514	0.537586	0.637976	0.668742	0.60721
595	0.57	0.59235	0.54765	0.640675	0.670197	0.611153	0.509238	0.564984	0.453492
594	0.58	0.6275	0.5325	0.639145	0.667862	0.610428	0.433412	0.45289	0.413934
593	0.58	0.6085	0.5515	0.585813	0.628932	0.542694	0.549398	0.580426	0.51837
592	0.59	0.618002	0.561998	0.556365	0.584759	0.527971	0.566254	0.587254	0.545254
591	0.59	0.621292	0.558708	0.589251	0.625715	0.552787	0.5123	0.568679	0.455921
590	0.58	0.621638	0.538362	0.515782	0.605899	0.425665	0.5321	0.595747	0.468453
589	0.55	0.576079	0.523921	0.612695	0.647235	0.593044	0.50234	0.543987	0.460693
588	0.59	0.632327	0.547673	0.590283	0.63393	0.513368	0.512345	0.558608	0.466082
587	0.61	0.654617	0.565383	0.642619	0.672953	0.625571	0.521344	0.555604	0.487084
586	0.57	0.590331	0.549669	0.616219	0.652744	0.579694	0.532768	0.563264	0.502272
585	0.55	0.622123	0.477877	0.599657	0.65451	0.544804	0.54378	0.578041	0.509519
584	0.58	0.616343	0.543657	0.571893	0.609141	0.534645	0.55342	0.59463	0.51221
583	0.56	0.585983	0.534017	0.603648	0.6581	0.549196	0.56957	0.604108	0.535032
582	0.58	0.620418	0.539582	0.664611	0.742013	0.587209	0.537132	0.566375	0.507889
581	0.58	0.623556	0.536444	0.603203	0.680934	0.525472	0.585692	0.626142	0.545242
580	0.56	0.602336	0.517664	0.627902	0.682034	0.57377	0.545155	0.566724	0.523586
580	0.56	0.648514	0.471486	0.575478	0.678007	0.472949	0.648122	0.66218	0.617444
579	0.65	0.691141	0.608859	0.639741	0.705263	0.574219	0.661378	0.684786	0.625749
578	0.61	0.67255	0.54745	0.654711	0.743727	0.565696	0.608693	0.671814	0.545571
577	0.57	0.627835	0.512165	0.53956	0.602556	0.476563	0.579919	0.676704	0.483135
576	0.65	0.693697	0.606303	0.589307	0.631957	0.546656	0.661378	0.747864	0.574893
575	0.58	0.646984	0.513016	0.648447	0.744354	0.55254	0.608693	0.671814	0.545571
574	0.57	0.61675	0.54325	0.498585	0.526579	0.470592	0.579919	0.676704	0.483135
573	0.57	0.628714	0.511286	0.631056	0.70368	0.558432	0.602467	0.647962	0.556973
572	0.61	0.612014	0.527986	0.495088	0.529716	0.46046	0.537465	0.572161	0.50277
571	0.59	0.645162	0.574838	0.644924	0.71023	0.579618	0.520983	0.552072	0.489894
570	0.64	0.65255	0.52745	0.588554	0.611039	0.56607	0.538182	0.571021	0.505344
569	0.66	0.697835	0.582165	0.571186	0.613837	0.528536	0.529836	0.552717	0.506954
568	0.64	0.703697	0.616303	0.627242	0.723149	0.531335	0.547588	0.577705	0.517471
567	0.59	0.706984	0.573016	0.512951	0.540944	0.484958	0.52332	0.54188	0.50476
566	0.55	0.62675	0.55325	0.62979	0.702414	0.557165	0.561358	0.58328	0.539436
565	0.59	0.608714	0.491286	0.500277	0.534906	0.465649	0.462327	0.481328	0.443326
564	0.64	0.632014	0.547986	0.640178	0.705484	0.574873	0.545641	0.568718	0.522564
563	0.57	0.675162	0.604838	0.531587	0.554071	0.509102	0.4967	0.510428	0.482972
562	0.57	0.59853	0.54147	0.651476	0.686154	0.616797	0.51021	0.525352	0.495069
561	0.56	0.604109	0.535891	0.600813	0.63976	0.561866	0.528412	0.548281	0.508544
560	0.54	0.607913	0.512087	0.579016	0.614964	0.543068	0.466797	0.482901	0.450694
559	0.62	0.579664	0.500336	0.524852	0.631787	0.417917	0.522179	0.586516	0.457841
558	0.58	0.661863	0.578137	0.511051	0.535665	0.486438	0.512714	0.52917	0.496258
557	0.57	0.627613	0.532387	0.559879	0.601964	0.517794	0.524568	0.548225	0.500911
556	0.69	0.57	0.57	0.558528	0.587127	0.529928	0.480587	0.495397	0.465776
555	0.59	0.717537	0.662463	0.529674	0.554341	0.505007	0.506296	0.521654	0.490939
554	0.68	0.62978	0.55022	0.525611	0.552638	0.498585	0.504746	0.521399	0.488093
553	0.64	0.712931	0.647069	0.575017	0.612215	0.53782	0.489217	0.507285	0.47115
552	0.62	0.64	0.64	0.680456	0.747456	0.613456	0.496289	0.51995	0.472629
551	0.62	0.667288	0.572712	0.601052	0.651678	0.550425	0.516076	0.5402	0.491952
550	0.59	0.62	0.62	0.542745	0.587231	0.498258	0.476883	0.499271	0.454496
549	0.61	0.631335	0.548665	0.561423	0.611357	0.511489	0.515495	0.542143	0.488847
548	0.61	0.61	0.61	0.620152	0.684504	0.555801	0.508304	0.536051	0.480557
547	0.64	0.646867	0.573133	0.546006	0.592355	0.499658	0.518928	0.545263	0.492593
546	0.61	0.694423	0.585577	0.569236	0.647957	0.490515	0.462999	0.496253	0.429745
545	0.55	0.688767	0.531233	0.500157	0.546309	0.454005	0.494335	0.522437	0.466233
544	0.58	0.55	0.55	0.539423	0.586528	0.492317	0.434961	0.455236	0.414685
543	0.62	0.633014	0.526986	0.566148	0.639787	0.492509	0.52801	0.567226	0.488795
542	0.58	0.688853	0.551147	0.486462	0.530986	0.441937	0.464391	0.489975	0.438807
541	0.64	0.648445	0.511555	0.519921	0.575445	0.464398	0.495827	0.527089	0.464564
540	0.58	0.698094	0.581906	0.503061	0.595212	0.41091	0.423785	0.465292	0.382279
539	0.6	0.643959	0.516041	0.517415	0.575415	0.459415	0.55198	0.591398	0.512561
538	0.57	0.645322	0.554678	0.536926	0.607517	0.466335	0.46072	0.493374	0.428066
537	0.6	0.619546	0.520454	0.624054	0.703799	0.544309	0.536824	0.573124	0.500524
536	0.65	0.668857	0.531143	0.529098	0.590765	0.467431	0.51574	0.55141	0.48007
535	0.65	0.716384	0.583616	0.571413	0.638396	0.504429	0.540606	0.576998	0.504214
534	0.66	0.71231	0.58769	0.599368	0.682089	0.516647	0.533067	0.573009	0.493125
533	0.59	0.714905	0.605095	0.490963	0.529521	0.452405	0.516797	0.542877	0.490716
532	0.61	0.66384	0.51616	0.514911	0.572711	0.45711	0.520025	0.555541	0.484509
531	0.62	0.61	0.61	0.588172	0.664677	0.511666	0.488997	0.521945	0.456048
530	0.65	0.6685	0.5715	0.561233	0.619555	0.502912	0.586428	0.624118	0.548738
529	0.6	0.65	0.65	0.626686	0.663485	0.598523	0.550074	0.635094	0.465054
528	0.6	0.673609	0.526391	0.627955	0.698997	0.556912	0.519355	0.549524	0.489187
527	0.55	0.663526	0.536474	0.564647	0.636816	0.492478	0.576113	0.620304	0.531921
526	0.65	0.599644	0.500356	0.507485	0.564167	0.450803	0.531377	0.568217	0.494538
525	0.64	0.713006	0.586994	0.502229	0.548275	0.456182	0.516221	0.545431	0.487011
524	0.6	0.683475	0.596525	0.633019	0.724163	0.541876	0.54245	0.582741	0.50216
523	0.67	0.665965	0.534035	0.583809	0.645584	0.522034	0.491229	0.51829	0.464168
522	0.57	0.717441	0.622559	0.555452	0.610163	0.500741	0.514192	0.542635	0.485749
521	0.63	0.617458	0.522542	0.54539	0.596816	0.493964	0.54355	0.573938	0.513163
520	0.6	0.687523	0.572477	0.591883	0.666332	0.517433	0.513828	0.547581	0.480075
519	0.6	0.662959	0.537041	0.544573	0.604156	0.48499	0.542537	0.577319	0.507755
518	0.67	0.651859	0.548141	0.573783	0.625872	0.521694	0.532444	0.5595	0.505388
517	0.57	0.729341	0.610659	0.559642	0.607972	0.511312	0.483855	0.506245	0.461466
516	0.62	0.627503	0.512497	0.546432	0.595771	0.497092	0.543116	0.572009	0.514224
515	0.59	0.680005	0.559995	0.490879	0.535758	0.446	0.536382	0.567517	0.505247
514	0.64	0.640125	0.539875	0.581071	0.635423	0.526719	0.522553	0.549013	0.496093
513	0.64	0.73125	0.54875	0.533509	0.581711	0.485306	0.547978	0.57762	0.518337
512	0.7	0.687349	0.592651	0.600673	0.646897	0.554448	0.487535	0.506697	0.468373
511	0.66	0.748849	0.651151	0.570903	0.624331	0.517475	0.509683	0.535162	0.484205
510	0.61	0.715843	0.604157	0.502204	0.539503	0.464905	0.519925	0.543421	0.496428
509	0.64	0.67315	0.54685	0.580948	0.620906	0.54099	0.516554	0.557627	0.475481
508	0.61	0.68448	0.59552	0.552123	0.595764	0.508482	0.555183	0.58088	0.529486
507	0.57	0.648493	0.571507	0.492497	0.526557	0.458437	0.489781	0.509928	0.469634
506	0.63	0.611615	0.528385	0.538279	0.582767	0.493791	0.518546	0.542769	0.494323
505	0.63	0.670185	0.589815	0.533751	0.570396	0.497105	0.517771	0.538312	0.497229
504	0.63	0.676814	0.583186	0.465331	0.495388	0.435275	0.428536	0.444241	0.412832
503	0.6	0.681353	0.578647	0.514599	0.541309	0.487888	0.534407	0.551756	0.517057
502	0.62	0.641532	0.558468	0.545737	0.575766	0.515707	0.495181	0.510557	0.479805
501	0.63	0.647582	0.592418	0.478181	0.498459	0.457903	0.497831	0.51159	0.484071
500	0.58	0.667506	0.592494	0.504406	0.531313	0.477499	0.502429	0.518553	0.486305

## Sheet: Smoldering-400
WL	CS_400	CS+Error_400	CS-Error_400	RS_400	RS+Error_400	RS-Error_400	WS-400	WS+Error_400	WS-Error_400
660	0.645265	0.697404	0.593125	0.489258	0.513218	0.465298	0.525927	0.591507	0.460346
659	0.527484	0.573116	0.481852	0.53344	0.558585	0.508296	0.42341	0.480265	0.366556
658	0.665617	0.715036	0.616198	0.555528	0.588931	0.522125	0.455427	0.52536	0.385494
657	0.676203	0.763489	0.588917	0.556983	0.581137	0.532829	0.439714	0.488416	0.391012
656	0.595161	0.649482	0.54084	0.617401	0.649381	0.58542	0.544262	0.609843	0.478682
655	0.533413	0.585553	0.481274	0.464499	0.488066	0.440933	0.546228	0.603082	0.489374
654	0.867065	0.912697	0.821432	0.545069	0.570431	0.519707	0.489596	0.559529	0.419663
653	0.483606	0.523037	0.444174	0.648472	0.680286	0.616658	0.512086	0.560789	0.463384
652	0.495498	0.542536	0.448459	0.477593	0.500666	0.45452	0.666445	0.736378	0.596512
651	0.587088	0.680209	0.493967	0.50754	0.559739	0.455342	0.58688	0.635582	0.538178
650	0.705409	0.751042	0.659777	0.606029	0.630495	0.581563	0.637379	0.723106	0.551651
649	0.543848	0.636412	0.451285	0.642922	0.669913	0.615932	0.618061	0.663451	0.572671
648	0.671441	0.721844	0.621039	0.594815	0.62005	0.56958	0.630886	0.687782	0.57399
647	0.626235	0.67464	0.577831	0.666958	0.69063	0.643285	0.559187	0.614078	0.504295
646	0.570115	0.610229	0.530001	0.586504	0.606476	0.566531	0.615697	0.666582	0.564812
645	0.511739	0.55363	0.469848	0.562759	0.58212	0.543398	0.65432	0.717642	0.590998
644	0.565016	0.607134	0.522899	0.595797	0.617114	0.574481	0.537575	0.583788	0.491363
643	0.641515	0.711559	0.571471	0.590634	0.614481	0.566786	0.61483	0.683287	0.546373
642	0.538392	0.578617	0.498166	0.635547	0.662956	0.608138	0.626685	0.708053	0.545316
641	0.590036	0.634934	0.545137	0.656803	0.686791	0.626815	0.627092	0.70834	0.545844
640	0.576936	0.619947	0.533925	0.642783	0.66858	0.616987	0.627979	0.690017	0.56594
639	0.59192	0.624456	0.559384	0.5757	0.610854	0.540546	0.596848	0.637813	0.555882
638	0.584501	0.615145	0.553857	0.606029	0.630495	0.581563	0.597103	0.624156	0.570049
637	0.617332	0.680433	0.554232	0.642922	0.669913	0.615932	0.606674	0.633088	0.58026
636	0.604945	0.654269	0.555622	0.594815	0.62005	0.56958	0.558572	0.583691	0.533453
635	0.497637	0.534034	0.461239	0.666958	0.69063	0.643285	0.667166	0.709946	0.624386
634	0.589411	0.631159	0.547663	0.625066	0.652124	0.598007	0.660878	0.705899	0.615857
633	0.576091	0.612605	0.539578	0.649105	0.678243	0.619968	0.660759	0.722805	0.598712
632	0.603047	0.645338	0.560756	0.651314	0.681161	0.621466	0.553344	0.582888	0.523801
631	0.596645	0.668476	0.524814	0.663472	0.68704	0.639903	0.666847	0.755923	0.57777
630	0.623347	0.671008	0.575686	0.552358	0.574083	0.530633	0.609171	0.656515	0.561827
629	0.535889	0.580377	0.491402	0.595965	0.620328	0.571602	0.679786	0.731615	0.627958
628	0.512473	0.555373	0.469574	0.624703	0.64988	0.599526	0.596848	0.641055	0.552641
627	0.591116	0.63954	0.542691	0.606029	0.630495	0.581563	0.597103	0.624419	0.569787
626	0.560984	0.601225	0.520742	0.642922	0.669913	0.615932	0.614766	0.655151	0.574381
625	0.520454	0.560494	0.480414	0.594815	0.62005	0.56958	0.596848	0.641055	0.552641
624	0.62159	0.715972	0.527209	0.666958	0.69063	0.643285	0.597103	0.624419	0.569787
623	0.653187	0.698819	0.607555	0.60775	0.637363	0.578137	0.596848	0.641055	0.552641
622	0.54158	0.623552	0.459608	0.6664	0.698273	0.634527	0.597103	0.624419	0.569787
621	0.509111	0.542119	0.476104	0.629509	0.656567	0.602452	0.61483	0.652605	0.577055
620	0.474176	0.503728	0.444623	0.718041	0.751797	0.684285	0.656685	0.713933	0.61976
619	0.506378	0.538411	0.474344	0.676269	0.703569	0.648968	0.649171	0.691869	0.606473
618	0.563882	0.597453	0.530311	0.627106	0.652793	0.601419	0.627979	0.677639	0.578318
617	0.51564	0.548411	0.48287	0.643022	0.667804	0.618241	0.666847	0.709659	0.624035
616	0.475291	0.501884	0.448697	0.65762	0.684841	0.630399	0.656685	0.703034	0.610335
615	0.589411	0.62358	0.555242	0.635501	0.666931	0.604072	0.609171	0.679643	0.538699
614	0.576091	0.611613	0.54057	0.648258	0.67217	0.624346	0.647979	0.692186	0.603772
613	0.603047	0.646557	0.559537	0.682936	0.706234	0.659637	0.596848	0.624164	0.569532
612	0.596645	0.621877	0.571413	0.657897	0.681641	0.634153	0.597103	0.648832	0.545374
611	0.623347	0.660885	0.585809	0.621123	0.64715	0.595096	0.636685	0.68391	0.58946
610	0.535889	0.567077	0.504702	0.619289	0.649706	0.588872	0.609171	0.666244	0.552098
609	0.512473	0.540758	0.484189	0.584536	0.60855	0.560523	0.679786	0.716881	0.642692
608	0.591116	0.620192	0.562039	0.606029	0.630495	0.581563	0.666847	0.710553	0.62314
607	0.560984	0.587367	0.5346	0.642922	0.669913	0.615932	0.609171	0.683711	0.534631
606	0.520454	0.544886	0.496022	0.594815	0.62005	0.56958	0.647979	0.689489	0.606469
605	0.62159	0.661179	0.582002	0.666958	0.69063	0.643285	0.596848	0.624563	0.569133
604	0.653187	0.685863	0.620511	0.642922	0.669913	0.615932	0.597103	0.628409	0.565796
603	0.54158	0.578992	0.504168	0.594815	0.62005	0.56958	0.636685	0.690681	0.582688
602	0.509111	0.539076	0.479147	0.666958	0.69063	0.643285	0.609171	0.677799	0.540543
601	0.474176	0.511233	0.437118	0.674563	0.706881	0.642245	0.679786	0.731598	0.627975
600	0.506378	0.537799	0.474957	0.623475	0.647924	0.599026	0.596848	0.662428	0.531267
599	0.563882	0.590028	0.537736	0.606029	0.630495	0.581563	0.597103	0.653957	0.540249
598	0.51564	0.545486	0.485795	0.642922	0.669913	0.615932	0.666847	0.73678	0.596914
597	0.475291	0.506964	0.443618	0.594815	0.62005	0.56958	0.596848	0.641055	0.552641
596	0.441684	0.482675	0.400692	0.666958	0.69063	0.643285	0.597103	0.624419	0.569787
595	0.516578	0.56204	0.471116	0.606029	0.630495	0.581563	0.596848	0.653702	0.539994
594	0.420909	0.45579	0.386029	0.642922	0.669913	0.615932	0.597103	0.667036	0.52717
593	0.507017	0.541358	0.472677	0.594815	0.62005	0.56958	0.660106	0.708808	0.611403
592	0.457012	0.487375	0.426649	0.666958	0.69063	0.643285	0.606755	0.650693	0.562817
591	0.461715	0.503742	0.419689	0.606029	0.630495	0.581563	0.594837	0.660418	0.529256
590	0.486838	0.529937	0.443739	0.642922	0.669913	0.615932	0.644036	0.70089	0.587182
589	0.550705	0.648499	0.452911	0.594815	0.62005	0.56958	0.640253	0.710186	0.57032
588	0.599141	0.752076	0.446207	0.666958	0.69063	0.643285	0.666847	0.715549	0.618144
587	0.594686	0.67774	0.511631	0.633212	0.673127	0.593296	0.609171	0.674752	0.54359
586	0.596486	0.671297	0.521676	0.610249	0.648907	0.571592	0.637979	0.694833	0.581124
585	0.58702	0.68735	0.48669	0.596506	0.63545	0.557562	0.596848	0.666781	0.526915
584	0.556308	0.631081	0.481536	0.662845	0.706512	0.619178	0.597103	0.645805	0.548401
583	0.543815	0.611204	0.476427	0.665032	0.740318	0.589745	0.626685	0.691354	0.562015
582	0.603339	0.666301	0.540377	0.628619	0.668964	0.588274	0.609171	0.670977	0.547365
581	0.548983	0.598573	0.499393	0.652048	0.69686	0.607236	0.579786	0.650847	0.508726
580	0.623223	0.669066	0.57738	0.59436	0.632341	0.556379	0.596848	0.637412	0.556283
580	0.731619	0.795849	0.667388	0.676469	0.728023	0.624916	0.540578	0.612369	0.468786
579	0.609093	0.661571	0.556614	0.637986	0.684885	0.591087	0.474413	0.516816	0.432009
578	0.563541	0.603075	0.524007	0.661677	0.710773	0.612581	0.508727	0.551334	0.46612
577	0.638875	0.710517	0.567232	0.647882	0.691457	0.604308	0.616841	0.678045	0.555636
576	0.675129	0.721792	0.628467	0.72125	0.773886	0.668614	0.658501	0.754372	0.56263
575	0.551843	0.59399	0.509696	0.603465	0.642396	0.564535	0.612132	0.694222	0.530041
574	0.639759	0.684076	0.595442	0.689889	0.735427	0.644351	0.598764	0.649894	0.547634
573	0.619921	0.658948	0.580895	0.5695	0.607613	0.531386	0.582445	0.587005	0.577885
572	0.65032	0.697579	0.603061	0.704991	0.752757	0.657225	0.500118	0.557004	0.443232
571	0.625944	0.670795	0.581093	0.633212	0.673127	0.593296	0.516736	0.570683	0.462789
570	0.645289	0.701849	0.588729	0.610249	0.648907	0.571592	0.639536	0.762734	0.634976
569	0.605843	0.648179	0.563507	0.596506	0.63545	0.557562	0.640578	0.712369	0.568786
568	0.626703	0.67857	0.574836	0.662845	0.706512	0.619178	0.474413	0.516816	0.432009
567	0.594469	0.641944	0.546994	0.665032	0.740318	0.589745	0.508727	0.551334	0.46612
566	0.717173	0.833332	0.601013	0.628619	0.668964	0.588274	0.616841	0.678045	0.555636
565	0.650776	0.692708	0.608843	0.652048	0.69686	0.607236	0.658501	0.754372	0.56263
564	0.678952	0.735077	0.622827	0.59436	0.632341	0.556379	0.612132	0.694222	0.530041
563	0.668414	0.71955	0.617279	0.59816	0.636185	0.560134	0.598764	0.649894	0.547634
562	0.732817	0.816463	0.649172	0.551476	0.586773	0.51618	0.52247	0.569048	0.475892
561	0.675441	0.731976	0.618906	0.596458	0.635701	0.557216	0.483871	0.525493	0.442248
560	0.54518	0.586758	0.503603	0.630525	0.674819	0.586232	0.523015	0.567047	0.478982
559	0.635575	0.689518	0.581632	0.600571	0.64195	0.559192	0.519519	0.562951	0.476087
558	0.715599	0.799499	0.6317	0.626254	0.670343	0.582165	0.483626	0.525176	0.442076
557	0.626298	0.682355	0.570241	0.627174	0.671982	0.582366	0.494053	0.536202	0.451904
556	0.647571	0.706713	0.588429	0.610217	0.654509	0.565925	0.539715	0.589626	0.489805
555	0.645492	0.728004	0.562979	0.615863	0.659403	0.572323	0.545892	0.601496	0.490289
554	0.70266	0.78248	0.62284	0.632491	0.685933	0.57905	0.525905	0.57927	0.47254
553	0.635334	0.693631	0.577036	0.587834	0.631064	0.544604	0.558423	0.60939	0.507456
552	0.641439	0.711397	0.571481	0.57567	0.616301	0.535038	0.534557	0.539117	0.529997
551	0.655778	0.729496	0.582059	0.630607	0.68225	0.578965	0.526879	0.587237	0.466521
550	0.705067	0.781471	0.628663	0.591842	0.635594	0.54809	0.527827	0.57837	0.477284
549	0.560797	0.621116	0.500478	0.652705	0.703936	0.601474	0.498732	0.548524	0.448939
548	0.600559	0.65518	0.545938	0.552493	0.607821	0.497165	0.496634	0.547993	0.445274
547	0.585043	0.635358	0.534729	0.636612	0.687275	0.585948	0.539704	0.606071	0.473338
546	0.623664	0.688872	0.558456	0.650067	0.705284	0.59485	0.517024	0.57479	0.459257
545	0.661326	0.732141	0.59051	0.663697	0.716384	0.61101	0.429095	0.473288	0.384902
544	0.598872	0.655614	0.542131	0.625133	0.675099	0.575167	0.485691	0.556616	0.414765
543	0.731793	0.808047	0.655539	0.721228	0.77969	0.662765	0.521463	0.567063	0.475863
542	0.608297	0.673533	0.543062	0.632306	0.684414	0.580198	0.52314	0.5277	0.51858
541	0.602657	0.676953	0.528361	0.624512	0.668862	0.580163	0.577972	0.645928	0.510016
540	0.646668	0.708685	0.584651	0.639901	0.691041	0.58876	0.441228	0.492443	0.390014
539	0.602347	0.661559	0.543135	0.595809	0.643129	0.548488	0.523785	0.588027	0.459542
538	0.610151	0.672446	0.547856	0.670713	0.721723	0.619702	0.499286	0.563093	0.435478
537	0.666876	0.738563	0.595188	0.670315	0.759806	0.580825	0.478162	0.536775	0.41955
536	0.590458	0.645326	0.535589	0.668017	0.718491	0.617544	0.557071	0.630733	0.483409
535	0.581178	0.633572	0.528784	0.628361	0.679342	0.57738	0.466904	0.515032	0.418776
534	0.581678	0.635805	0.52755	0.68082	0.73626	0.62538	0.472534	0.529374	0.415695
533	0.668596	0.753984	0.583209	0.624032	0.670137	0.577926	0.492784	0.556402	0.429165
532	0.575312	0.623111	0.527513	0.598805	0.646952	0.550659	0.498219	0.556972	0.439466
531	0.616102	0.666376	0.565828	0.604079	0.648492	0.559667	0.534048	0.608833	0.459263
530	0.593772	0.650358	0.537186	0.636401	0.68324	0.589561	0.476655	0.518131	0.43518
529	0.624796	0.683854	0.565739	0.61889	0.663735	0.574044	0.44864	0.495106	0.402173
528	0.618125	0.676319	0.559931	0.632524	0.682273	0.582775	0.494796	0.549814	0.439779
527	0.585917	0.64202	0.529814	0.663377	0.714812	0.611943	0.616507	0.621067	0.611947
526	0.59993	0.650865	0.548995	0.655251	0.702038	0.608463	0.511502	0.580803	0.442201
525	0.597414	0.647784	0.547043	0.686633	0.735686	0.63758	0.512548	0.57453	0.450566
524	0.555611	0.602031	0.509192	0.617875	0.661954	0.573797	0.602264	0.683244	0.521284
523	0.561047	0.620477	0.501618	0.654902	0.703777	0.606027	0.524703	0.592187	0.457219
522	0.578066	0.621622	0.53451	0.645789	0.691943	0.599634	0.482391	0.543904	0.420877
521	0.578951	0.620763	0.537139	0.656373	0.703897	0.608849	0.519298	0.581914	0.456683
520	0.649111	0.700753	0.597469	0.635461	0.67825	0.592672	0.538369	0.603579	0.473159
519	0.513611	0.553672	0.473551	0.652339	0.699048	0.605629	0.551661	0.622262	0.48106
518	0.596961	0.641147	0.552776	0.651823	0.696932	0.606714	0.531695	0.588657	0.474733
517	0.583804	0.627758	0.53985	0.667217	0.725704	0.60873	0.555811	0.625455	0.486167
516	0.623256	0.668399	0.578112	0.673801	0.720431	0.627172	0.49303	0.542024	0.444037
515	0.595362	0.637841	0.552883	0.618631	0.660538	0.576724	0.586781	0.591341	0.582221
514	0.599153	0.648084	0.550221	0.638347	0.682811	0.593883	0.553555	0.640607	0.466502
513	0.640357	0.691431	0.589283	0.597961	0.637638	0.558285	0.507848	0.556446	0.45925
512	0.558834	0.603331	0.514336	0.627387	0.669663	0.585111	0.496661	0.540539	0.452783
511	0.584903	0.622078	0.547728	0.600281	0.638663	0.5619	0.531375	0.576258	0.486492
510	0.602284	0.648212	0.556355	0.643555	0.68492	0.60219	0.51785	0.570626	0.465075
509				0.595171	0.632626	0.557715	0.494172	0.548841	0.439502
508				0.611856	0.651158	0.572553	0.465974	0.50507	0.426878
507							0.488245	0.532795	0.443695
506							0.517281	0.57295	0.461612
505							0.56432	0.626082	0.502557
504							0.54358	0.592402	0.494759
503							0.468331	0.515386	0.421277
502							0.570868	0.636794	0.504943
501							0.426858	0.46636	0.387356
500							0.47743	0.54146	0.413399

## Sheet: Flaming-300
WL	CF_300	CF+Error_300	CF-Error_300	RF_300	RF+Error_300	RF-Error_300	WF-300	WF+Error_300	WF-Error_300
660				0.550818	0.606388	0.495248
659				0.564692	0.623869	0.505515
658	0.573345	0.635385	0.511305	0.579644	0.635618	0.52367
657	0.543834	0.592759	0.494909	0.542758	0.597121	0.488395
656	0.547843	0.582709	0.512977	0.555262	0.616158	0.494366
655	0.545671	0.563113	0.528229	0.523324	0.5777	0.468948	0.528331	0.553335	0.503326
654	0.558653	0.577854	0.539452	0.524069	0.574932	0.473206	0.523669	0.546004	0.501334
653	0.576834	0.587298	0.56637	0.522198	0.581036	0.46336	0.522896	0.538611	0.507182
652	0.567615	0.587387	0.547843	0.506238	0.562553	0.449923	0.527883	0.546059	0.509706
651	0.558682	0.577673	0.53969	0.489084	0.545535	0.432633	0.545217	0.57211	0.518323
650	0.568145	0.590122	0.546169	0.514691	0.575763	0.453619	0.500847	0.562855	0.438838
649	0.548995	0.567091	0.530898	0.521319	0.585134	0.457504	0.544022	0.555515	0.532529
648	0.587445	0.619175	0.555716	0.480924	0.535287	0.426561	0.522503	0.536345	0.50866
647	0.567098	0.601641	0.532556	0.50219	0.563086	0.441294	0.511379	0.540498	0.48226
646	0.556262	0.590091	0.522434	0.490544	0.54492	0.436168	0.53976	0.567552	0.511967
645	0.57032	0.5962	0.54444	0.484177	0.53504	0.433314	0.550105	0.567054	0.533156
644	0.564764	0.582239	0.54729	0.480748	0.539586	0.42191	0.528331	0.54018	0.516482
643	0.509316	0.538307	0.480326	0.495639	0.551954	0.439324	0.523669	0.542593	0.504745
642	0.577437	0.607814	0.547059	0.508981	0.565432	0.45253	0.522896	0.536225	0.509567
641	0.622659	0.663074	0.582245	0.519427	0.580499	0.458355	0.527883	0.55073	0.505035
640	0.611678	0.645696	0.57766	0.498576	0.562391	0.434761	0.545217	0.567144	0.52329
639	0.58141	0.633629	0.529192	0.527489	0.585609	0.469369	0.500847	0.511668	0.490026
638	0.547298	0.599905	0.494691	0.516226	0.62242	0.410032	0.544022	0.563117	0.524927
637	0.562601	0.616743	0.50846	0.513175	0.571916	0.454434	0.522503	0.53303	0.511975
636	0.55489	0.590448	0.519332	0.522166	0.576531	0.467801	0.511379	0.532652	0.490105
635	0.56368	0.627398	0.499961	0.514202	0.56971	0.458694	0.53976	0.557425	0.522094
634	0.556618	0.614632	0.498603	0.502034	0.555435	0.448633	0.550105	0.564251	0.535959
633	0.552458	0.584188	0.520729	0.520352	0.574212	0.466492	0.55959	0.572901	0.54628
632	0.565866	0.600409	0.531324	0.51291	0.566939	0.458881	0.598137	0.614672	0.581603
631	0.559598	0.593427	0.525769	0.498721	0.550571	0.446871	0.554325	0.570503	0.538147
630	0.559757	0.585637	0.533877	0.514752	0.568197	0.461307	0.560001	0.580558	0.539443
629	0.563306	0.580781	0.545832	0.511689	0.569894	0.453484	0.517138	0.542368	0.491908
628	0.544073	0.573064	0.515082	0.506366	0.564339	0.448393	0.594179	0.608427	0.57993
627	0.555738	0.586115	0.52536	0.50752	0.561183	0.453857	0.548797	0.564126	0.533468
626	0.572069	0.612483	0.531655	0.52117	0.577121	0.465219	0.541207	0.555826	0.526588
625	0.580391	0.614409	0.546373	0.513584	0.566733	0.460435	0.560055	0.576577	0.543533
624	0.593863	0.646081	0.541645	0.473751	0.534226	0.413276	0.550284	0.56999	0.530578
623	0.557829	0.610437	0.505222	0.490022	0.543432	0.436612	0.561952	0.578236	0.545668
622	0.566711	0.620853	0.51257	0.486045	0.54039	0.4317	0.555596	0.568075	0.543116
621	0.551666	0.587224	0.516108	0.485345	0.539714	0.430976	0.567477	0.582025	0.552929
620	0.547993	0.611711	0.484275	0.496751	0.549137	0.444365	0.547309	0.564036	0.530582
619	0.553968	0.611982	0.495953	0.506075	0.559028	0.453122	0.536381	0.563709	0.509054
618	0.565342	0.629139	0.501544	0.516002	0.570452	0.461552	0.537279	0.551334	0.523223
617	0.578324	0.635732	0.520917	0.506227	0.559137	0.453317	0.546655	0.560693	0.532616
616	0.592366	0.689541	0.49519	0.52856	0.583937	0.473183	0.575446	0.590883	0.56001
615	0.597805	0.677277	0.518333	0.5368	0.592919	0.480681	0.560028	0.57422	0.545837
614	0.600657	0.672304	0.529011	0.530647	0.586104	0.47519	0.552557	0.567899	0.537216
613	0.587954	0.644914	0.530994	0.557963	0.616133	0.499793	0.561661	0.575685	0.547638
612	0.579837	0.634954	0.52472	0.513392	0.568034	0.45875	0.547145	0.56076	0.533531
611	0.558499	0.635927	0.481072	0.527461	0.582038	0.472884	0.561204	0.59914	0.523269
610	0.556316	0.629986	0.482647	0.523805	0.579411	0.468199	0.560473	0.580649	0.540297
609	0.581507	0.630712	0.532303	0.55216	0.609616	0.494704	0.54216	0.557541	0.526779
608	0.550613	0.596249	0.504976	0.520562	0.574667	0.466457	0.533902	0.546879	0.520925
607	0.56802	0.633968	0.502072	0.520318	0.574652	0.465984	0.548367	0.559435	0.5373
606	0.563768	0.630809	0.496728	0.521551	0.576435	0.466667	0.533261	0.544183	0.522339
605	0.544207	0.615003	0.473411	0.51177	0.564659	0.458881	0.566475	0.601089	0.531861
604	0.551703	0.619836	0.483569	0.505173	0.560714	0.449632	0.574869	0.590129	0.559608
603	0.532785	0.587902	0.477668	0.497204	0.549021	0.445387	0.519632	0.534101	0.505163
602	0.538585	0.616013	0.461158	0.50173	0.554104	0.449356	0.543302	0.558493	0.52811
601	0.562516	0.636186	0.488847	0.5045	0.602719	0.406281	0.551041	0.564742	0.537339
600	0.54024	0.589444	0.491035	0.504188	0.559556	0.44882	0.520833	0.531761	0.509904
599	0.542674	0.58831	0.497037	0.489411	0.543864	0.434958	0.513893	0.532849	0.494937
598	0.532641	0.598589	0.466692	0.52936	0.587302	0.471418	0.569679	0.584254	0.555104
597	0.532316	0.599356	0.465276	0.545094	0.603529	0.486659	0.520496	0.533356	0.507636
596	0.515832	0.586629	0.445036	0.485059	0.536181	0.433937	0.521235	0.532892	0.509578
595	0.520442	0.588575	0.452309	0.519672	0.574663	0.464681	0.547031	0.561322	0.53274
594	0.518416	0.573533	0.463298	0.4958	0.550185	0.441415	0.537478	0.556231	0.518725
593	0.528378	0.605805	0.45095	0.497719	0.55028	0.445158	0.542659	0.557591	0.527727
592	0.539266	0.612935	0.465597	0.513863	0.568159	0.459567	0.530973	0.546581	0.515366
591	0.523037	0.572242	0.473832	0.503892	0.558913	0.448871	0.56878	0.592014	0.545545
590	0.543082	0.588718	0.497445	0.489895	0.546491	0.433299	0.518871	0.547914	0.489828
589	0.553508	0.619456	0.487559	0.499717	0.555722	0.443712	0.561169	0.595641	0.526696
588	0.500181	0.567221	0.433141	0.504979	0.558492	0.451466	0.548403	0.562124	0.534682
587	0.553261	0.624057	0.482464	0.485274	0.535416	0.435132	0.567246	0.580696	0.553796
586	0.50744	0.575573	0.439306	0.514747	0.571405	0.458089	0.576048	0.593277	0.55882
585	0.510137	0.565254	0.455019	0.55719	0.615312	0.499068	0.530248	0.549953	0.510543
584	0.506595	0.584023	0.429167	0.552516	0.612636	0.492396	0.583546	0.610678	0.556415
583	0.544799	0.618469	0.47113	0.572383	0.633879	0.510887	0.538025	0.553966	0.522084
582	0.552184	0.601388	0.502979	0.613092	0.680334	0.54585	0.555404	0.568816	0.541992
581	0.550301	0.595937	0.504664	0.526491	0.585001	0.467981	0.540864	0.599304	0.492423
580	0.565537	0.631486	0.499589	0.508437	0.564443	0.452431	0.531573	0.545712	0.517434
580	0.588389	0.65543	0.521349	0.518147	0.599354	0.43694
579	0.562434	0.633231	0.491638	0.589154	0.64007	0.538238	0.515051	0.542981	0.487121
578	0.580285	0.648418	0.512151	0.535613	0.590307	0.480919	0.549503	0.582241	0.516765
577	0.60344	0.62869	0.57819	0.531213	0.571118	0.491308	0.541766	0.562093	0.521439
576	0.590055	0.618385	0.561724	0.539235	0.572377	0.506093	0.540417	0.558112	0.522722
575	0.565794	0.596816	0.534773	0.549934	0.576285	0.523583	0.57342	0.589646	0.557195
574	0.554605	0.572271	0.53694	0.546745	0.574343	0.519147	0.531204	0.546501	0.515907
573	0.546903	0.563008	0.530797	0.57299	0.596575	0.549405	0.55694	0.571745	0.542134
572	0.526954	0.540289	0.513619	0.577819	0.610433	0.545205	0.563792	0.582875	0.54471
571	0.531828	0.548837	0.514818	0.552166	0.576362	0.52797	0.57772	0.593949	0.56149
570	0.530126	0.547346	0.512905	0.558234	0.587575	0.528893	0.544028	0.559708	0.528348
569	0.572546	0.614983	0.53011	0.564056	0.582462	0.54565	0.548263	0.56002	0.536506
568	0.572252	0.584889	0.559615	0.540201	0.558296	0.522106	0.58497	0.597614	0.572325
567	0.573517	0.584972	0.562061	0.575402	0.600715	0.550089	0.553586	0.567545	0.539627
566	0.58017	0.593377	0.566963	0.587628	0.601914	0.573342	0.552367	0.563729	0.541005
565	0.583683	0.605656	0.561709	0.571522	0.585904	0.55714	0.529757	0.540575	0.51894
564	0.542658	0.554269	0.531048	0.573093	0.591199	0.554987	0.558121	0.56992	0.546322
563	0.541778	0.553183	0.530372	0.569816	0.582935	0.556697	0.540556	0.550621	0.530491
562	0.535987	0.548011	0.523964	0.564049	0.581245	0.546853	0.549483	0.5623	0.536667
561	0.547207	0.561068	0.533346	0.554405	0.578994	0.529816	0.526272	0.538992	0.513551
560	0.518775	0.532839	0.504712	0.551487	0.571871	0.531103	0.539879	0.552375	0.527384
559	0.551945	0.567521	0.536368	0.565712	0.582798	0.548626	0.517515	0.528192	0.506838
558	0.536134	0.549559	0.522709	0.53973	0.556759	0.522701	0.516765	0.527467	0.506062
557	0.540626	0.552814	0.528438	0.530062	0.546454	0.51367	0.558129	0.570335	0.545924
556	0.5591	0.575108	0.543093	0.56636	0.582966	0.549754	0.562729	0.574395	0.551062
555	0.513686	0.528151	0.499221	0.572897	0.591515	0.554279	0.549704	0.562471	0.536937
554	0.547049	0.561769	0.532329	0.544756	0.567144	0.522368	0.540882	0.554111	0.527653
553	0.553026	0.568401	0.537652	0.555068	0.576803	0.533333	0.554124	0.567432	0.540815
552	0.547384	0.561421	0.533346	0.562586	0.577831	0.547341	0.543557	0.554275	0.532839
551	0.552675	0.564843	0.540507	0.561659	0.585048	0.53827	0.545983	0.560937	0.531028
550	0.55379	0.570182	0.537399	0.568731	0.589876	0.547586	0.54001	0.553973	0.526048
549	0.544684	0.563227	0.526141	0.543645	0.565383	0.521907	0.573047	0.586986	0.559108
548	0.559479	0.580205	0.538754	0.554149	0.580788	0.52751	0.549289	0.565608	0.53297
547	0.565914	0.58424	0.547589	0.576826	0.596085	0.557567	0.54319	0.556023	0.530357
546	0.549079	0.567093	0.531064	0.545404	0.57045	0.520358	0.54848	0.565151	0.531808
545	0.524312	0.54181	0.506814	0.586771	0.610609	0.562933	0.536414	0.552098	0.520731
544	0.541286	0.559025	0.523546	0.527897	0.546517	0.509277	0.558898	0.573567	0.54423
543	0.569789	0.592423	0.547156	0.533866	0.565294	0.502438	0.551819	0.571373	0.532265
542	0.543998	0.560646	0.527349	0.545457	0.569219	0.521695	0.543837	0.559155	0.52852
541	0.536873	0.560083	0.513663	0.537553	0.556042	0.519064	0.558514	0.57106	0.545967
540	0.565613	0.5824	0.548827	0.526385	0.5608	0.49197	0.540417	0.561343	0.51949
539	0.575278	0.5896	0.560956	0.562619	0.590525	0.534713	0.546962	0.56645	0.527475
538	0.534937	0.558404	0.51147	0.551212	0.581405	0.521019	0.545319	0.564141	0.526496
537	0.563777	0.583146	0.544407	0.551077	0.582056	0.520098	0.545265	0.563934	0.526595
536	0.537435	0.556343	0.518527	0.554587	0.590444	0.51873	0.538066	0.558106	0.518027
535	0.544983	0.565642	0.524324	0.544315	0.572748	0.515882	0.52765	0.545564	0.509736
534	0.537352	0.558422	0.516283	0.558231	0.58804	0.528422	0.525123	0.541896	0.50835
533	0.521486	0.542722	0.500251	0.55753	0.581128	0.533932	0.538656	0.5556	0.521713
532	0.506523	0.521538	0.491509	0.561112	0.590512	0.531712	0.538856	0.557845	0.519867
531	0.525937	0.539196	0.512679	0.559135	0.583756	0.534514	0.531328	0.546348	0.516307
530	0.528163	0.54633	0.509996	0.586951	0.620331	0.553571	0.533624	0.55216	0.515089
529	0.536355	0.556417	0.516293	0.575065	0.60538	0.54475	0.515231	0.533264	0.497198
528	0.539313	0.555989	0.522638	0.599024	0.630466	0.567582	0.531462	0.550423	0.512501
527	0.550547	0.56962	0.531474	0.579362	0.609907	0.548817	0.543102	0.561819	0.524386
526	0.530567	0.5482	0.512933	0.524526	0.566952	0.4821	0.540447	0.563416	0.517478
525	0.540093	0.561575	0.51861	0.545832	0.574924	0.51674	0.536547	0.554239	0.518855
524	0.543702	0.567845	0.519559	0.570844	0.6049	0.536788	0.521254	0.540096	0.502412
523	0.53363	0.552257	0.515003	0.530575	0.563118	0.498032	0.536982	0.556198	0.517766
522	0.530715	0.545543	0.515888	0.551389	0.58362	0.519158	0.528105	0.545292	0.510917
521	0.52595	0.543296	0.508604	0.559781	0.595457	0.524105	0.510952	0.530114	0.49179
520	0.565504	0.585766	0.545241	0.517607	0.549518	0.485696	0.526274	0.544313	0.508235
519	0.535673	0.552409	0.518938	0.548086	0.574773	0.521399	0.517316	0.532251	0.502381
518	0.550561	0.566428	0.534694	0.550852	0.573349	0.528355	0.554007	0.568388	0.539625
517	0.540267	0.569271	0.511263	0.556717	0.578255	0.535179	0.506368	0.518967	0.493769
516	0.536045	0.552847	0.519243	0.578705	0.60473	0.55268	0.52181	0.536454	0.507166
515	0.528418	0.543125	0.51371	0.56723	0.587309	0.547151	0.53768	0.550705	0.524655
514	0.539028	0.556614	0.521442	0.528288	0.551213	0.505363	0.538956	0.552825	0.525088
513	0.532047	0.542459	0.521634	0.569568	0.588663	0.550473	0.527282	0.539535	0.51503
512	0.541266	0.556368	0.526165	0.537099	0.557957	0.516241	0.526238	0.539326	0.51315
511	0.533186	0.545332	0.521041	0.528305	0.541563	0.515047	0.536377	0.546445	0.526309
510	0.534475	0.547657	0.521293	0.52562	0.544575	0.506665	0.532046	0.544481	0.519612
509	0.541145	0.554567	0.527722	0.540705	0.565119	0.516291	0.536446	0.55122	0.521672
508	0.525195	0.537126	0.513263	0.511273	0.526694	0.495852	0.530519	0.540987	0.52005
507	0.539864	0.554497	0.525231	0.546079	0.565264	0.526894	0.524257	0.536255	0.512259
506	0.519779	0.531877	0.507682	0.553644	0.56938	0.537908	0.53354	0.545146	0.521934
505	0.523491	0.534206	0.512777	0.524616	0.550428	0.498804	0.533104	0.549001	0.517206
504	0.539081	0.552783	0.52538	0.541628	0.557868	0.525388	0.540867	0.552668	0.529066
503	0.535354	0.546972	0.523735	0.557345	0.570395	0.544295	0.525002	0.535033	0.51497
502	0.550994	0.561843	0.540145	0.545673	0.566569	0.524777	0.514656	0.527395	0.501917
501	0.510695	0.523524	0.497866	0.524616	0.537938	0.511294	0.534645	0.545177	0.524113
500	0.524729	0.538325	0.511133	0.541628	0.559583	0.523673	0.523292	0.535044	0.511541

## Sheet: Smoldering-300
WL	CS_300	CS+Error_300	CS-Error_300	RS_300	RS+Error_300	RS-Error_300	WS-300	WS+Error_300	WS-Error_300
660	0.600304	0.653488	0.54712
659	0.606136	0.66367	0.548603
658	0.567949	0.614494	0.521403
657	0.550562	0.587807	0.513316
656	0.492318	0.526894	0.457743
655	0.458519	0.516827	0.400211
654	0.43534	0.473716	0.396964
653	0.458632	0.478072	0.439192	0.67302	0.72353	0.622511
652	0.463463	0.510617	0.416308	0.662437	0.697488	0.627385
651	0.421233	0.445111	0.397356	0.619595	0.643422	0.595769	0.66263	0.720164	0.605097
650	0.49119	0.513503	0.468877	0.642696	0.668413	0.616978	0.671049	0.717595	0.624504
649	0.511899	0.570169	0.453629	0.623005	0.645702	0.600309	0.623246	0.660492	0.586001
648	0.401129	0.451377	0.35088	0.564761	0.585802	0.543721	0.648314	0.68289	0.613738
647	0.49533	0.52918	0.46148	0.648994	0.677714	0.620273	0.63837	0.696678	0.580062
646	0.434067	0.466444	0.40169	0.545194	0.565747	0.524641	0.570264	0.60864	0.531888
645	0.401463	0.425639	0.377287	0.503865	0.521242	0.486489	0.467183	0.486623	0.447743
644	0.400325	0.422982	0.377669	0.539631	0.562357	0.516906	0.556705	0.603859	0.509551
643	0.545548	0.566639	0.524456	0.473208	0.492841	0.453575	0.454694	0.478571	0.430817
642	0.511053	0.537494	0.484612	0.564606	0.586329	0.542884	0.496717	0.51903	0.474404
641	0.517499	0.540488	0.49451	0.641897	0.669255	0.614539	0.541483	0.574975	0.503321
640	0.497027	0.517219	0.476835	0.63489	0.672128	0.605676	0.602706	0.657056	0.585522
639	0.440237	0.470544	0.409931	0.570416	0.59155	0.549282	0.558115	0.591965	0.524265
638	0.441435	0.462311	0.42056	0.581222	0.636168	0.526276	0.588903	0.62128	0.556526
637	0.468082	0.496329	0.439834	0.546553	0.56953	0.523575	0.529239	0.553415	0.505063
636	0.449704	0.474037	0.425372	0.534851	0.552652	0.51705	0.492691	0.515347	0.470034
635	0.458648	0.477556	0.43974	0.56482	0.585577	0.544063	0.514958	0.536049	0.493866
634	0.475862	0.498277	0.453447	0.557164	0.576734	0.537595	0.533453	0.559894	0.507012
633	0.465843	0.487523	0.444162	0.54862	0.566942	0.530297	0.540098	0.563087	0.517109
632	0.465317	0.489658	0.440976	0.557921	0.577279	0.538562	0.547245	0.567437	0.527053
631	0.440897	0.467447	0.414347	0.541272	0.559366	0.523177	0.556589	0.586896	0.526283
630	0.462965	0.495364	0.430565	0.549713	0.56828	0.531146	0.547228	0.568103	0.526352
629	0.42615	0.450171	0.402129	0.571267	0.595152	0.547381	0.508019	0.536266	0.479771
628	0.457291	0.480555	0.434028	0.578846	0.603296	0.554396	0.50454	0.528872	0.480208
627	0.487018	0.504354	0.469682	0.558479	0.577853	0.539105	0.5102	0.529108	0.491292
626	0.480144	0.50302	0.457267	0.560288	0.58116	0.539417	0.548054	0.570469	0.525639
625	0.467536	0.4907	0.444371	0.554069	0.572556	0.535583	0.497858	0.519538	0.476178
624	0.453118	0.478883	0.427354	0.572524	0.604723	0.540326	0.498456	0.522797	0.474115
623	0.434518	0.457457	0.411579	0.608246	0.631391	0.585102	0.550499	0.577049	0.523949
622	0.446019	0.465218	0.42682	0.596064	0.619819	0.572308	0.553694	0.586093	0.521294
621	0.44601	0.465531	0.426488	0.590562	0.614224	0.5669	0.566808	0.59083	0.542787
620	0.451743	0.472009	0.431476	0.561447	0.581166	0.541729	0.503094	0.526358	0.479831
619	0.455515	0.475987	0.435042	0.532434	0.550662	0.514206	0.491747	0.509083	0.47441
618	0.468621	0.490691	0.446551	0.546353	0.565293	0.527412	0.50606	0.528937	0.483184
617	0.463291	0.486317	0.440265	0.605339	0.626115	0.584563	0.511436	0.534601	0.488271
616	0.494597	0.518354	0.470841	0.602525	0.623053	0.581997	0.555416	0.581181	0.529652
615	0.467722	0.49302	0.442424	0.563249	0.582425	0.544072	0.53218	0.555119	0.509241
614	0.451066	0.473066	0.429066	0.584491	0.604538	0.564445	0.477709	0.496909	0.45851
613	0.464205	0.490505	0.437905	0.562349	0.581468	0.543231	0.519041	0.538562	0.49952
612	0.466169	0.485464	0.446873	0.583508	0.604843	0.562173	0.510996	0.531263	0.49073
611	0.48093	0.499243	0.462617	0.550133	0.568294	0.531972	0.531316	0.551788	0.510843
610	0.45779	0.482081	0.433499	0.550192	0.569828	0.530556	0.516377	0.538447	0.494307
609	0.465182	0.491027	0.439337	0.54291	0.561042	0.524779	0.50716	0.530186	0.484134
608	0.482499	0.506619	0.458378	0.535581	0.553435	0.517727	0.524863	0.54862	0.501106
607	0.467239	0.488393	0.446085	0.557271	0.576131	0.538411	0.520764	0.546062	0.495466
606	0.460501	0.48563	0.435373	0.525596	0.544186	0.507006	0.505518	0.527518	0.483518
605	0.424843	0.453396	0.39629	0.550815	0.569081	0.53255	0.530583	0.556883	0.504283
604	0.439763	0.463055	0.416472	0.52394	0.544142	0.503737	0.491323	0.510618	0.472027
603	0.44833	0.470647	0.426013	0.553036	0.572046	0.534026	0.482626	0.500939	0.464313
602	0.415647	0.434219	0.397075	0.519401	0.536762	0.502039	0.53206	0.556351	0.507769
601	0.436195	0.457105	0.415284	0.538021	0.583374	0.492668	0.507332	0.533178	0.481487
600	0.428269	0.449144	0.407394	0.538698	0.55913	0.518267	0.497067	0.521188	0.472946
599	0.411968	0.433958	0.389978	0.498588	0.518521	0.478655	0.472139	0.493293	0.450985
598	0.417445	0.440716	0.394174	0.52045	0.540487	0.500414	0.458448	0.483576	0.43332
597	0.376656	0.397463	0.35585	0.523893	0.543255	0.50453	0.495934	0.524487	0.467381
596	0.37435	0.400297	0.348402	0.5035	0.520956	0.486045	0.478742	0.502033	0.45545
595	0.405303	0.427386	0.38322	0.515852	0.533865	0.497839	0.449316	0.471633	0.426999
594	0.364062	0.388407	0.339717	0.497725	0.516719	0.478731	0.44785	0.466422	0.429278
593	0.44086	0.461517	0.420203	0.507313	0.525067	0.489558	0.46247	0.48338	0.44156
592	0.35965	0.390277	0.329022	0.525068	0.543444	0.506693	0.462668	0.483543	0.441793
591	0.394899	0.416228	0.37357	0.51875	0.538406	0.499093	0.443644	0.465635	0.421654
590	0.449693	0.474527	0.424859	0.449411	0.46937	0.429453	0.427015	0.450286	0.403744
589	0.329923	0.351088	0.308757	0.52071	0.542272	0.499148	0.43667	0.457476	0.415863
588	0.430346	0.465936	0.394756	0.547575	0.566779	0.52837	0.468383	0.49433	0.442435
587	0.340987	0.364258	0.317716	0.523062	0.540827	0.505298	0.455729	0.477812	0.433646
586	0.437972	0.458778	0.417165	0.542242	0.563514	0.52097	0.48627	0.510615	0.461925
585	0.34337	0.369317	0.317422	0.483416	0.499544	0.467288	0.458215	0.478871	0.437558
584	0.505433	0.527516	0.48335	0.54363	0.563926	0.523334	0.480361	0.510988	0.449734
583	0.535735	0.56008	0.51139	0.552065	0.571902	0.532227	0.485324	0.506653	0.463995
582	0.548643	0.5693	0.502799	0.547003	0.568042	0.525965	0.477295	0.502129	0.45246
581	0.494899	0.525526	0.464272	0.543052	0.564793	0.521311	0.486075	0.507241	0.46491
580	0.549693	0.571022	0.528364	0.531664	0.552684	0.510644	0.478742	0.514332	0.443152
580	0.540882	0.579897	0.501867	0.484744	0.529415	0.440073	0.465421	0.53958	0.391261
579	0.533704	0.594623	0.472785	0.51251	0.549797	0.475223	0.547694	0.616477	0.478911
578	0.516092	0.566399	0.465785	0.487611	0.523372	0.45185	0.484008	0.541691	0.426325
577	0.48238	0.518283	0.446477	0.534239	0.566783	0.501696	0.530709	0.578108	0.48331
576	0.510804	0.538699	0.482909	0.522407	0.552645	0.492169	0.507183	0.547837	0.46653
575	0.528091	0.550259	0.505923	0.514104	0.542417	0.48579	0.506619	0.543552	0.469685
574	0.484922	0.512535	0.457309	0.543568	0.574117	0.513019	0.552944	0.595394	0.510494
573	0.567958	0.590783	0.545133	0.553111	0.583457	0.522766	0.53885	0.577686	0.500014
572	0.46551	0.490307	0.440713	0.517054	0.547036	0.487072	0.477658	0.514949	0.440367
571	0.475734	0.496065	0.455403	0.541562	0.571487	0.511638	0.491072	0.52619	0.455954
570	0.48854	0.513955	0.463125	0.547032	0.577699	0.516365	0.539281	0.579712	0.498849
569	0.561622	0.577375	0.545868	0.535301	0.563403	0.5072	0.528841	0.563469	0.494214
568	0.467456	0.481808	0.453104	0.558166	0.587477	0.528856	0.50555	0.538336	0.472764
567	0.472559	0.490357	0.454761	0.571695	0.602766	0.540624	0.497358	0.531384	0.463332
566	0.488344	0.503148	0.47354	0.540508	0.568698	0.512318	0.542535	0.577463	0.507607
565	0.473613	0.486188	0.461038	0.520186	0.547289	0.493084	0.486772	0.517817	0.455728
564	0.500971	0.514834	0.487108	0.549857	0.578664	0.521049	0.511158	0.544029	0.478286
563	0.448267	0.458298	0.438236	0.555827	0.584431	0.527223	0.473087	0.50244	0.443735
562	0.444395	0.457911	0.430879	0.533133	0.561531	0.504735	0.459954	0.489986	0.429921
561	0.452231	0.469171	0.435291	0.542586	0.571774	0.513398	0.51278	0.547146	0.478415
560	0.450223	0.46402	0.436426	0.549481	0.578766	0.520197	0.47005	0.500735	0.439365
559	0.464385	0.47809	0.45068	0.533711	0.561594	0.505828	0.523709	0.55718	0.490237
558	0.454703	0.468076	0.44133	0.548242	0.576922	0.519561	0.513178	0.545953	0.480402
557	0.485104	0.499219	0.470989	0.546814	0.575617	0.518012	0.510136	0.543061	0.477211
556	0.429936	0.443821	0.416051	0.542647	0.570971	0.514323	0.535368	0.569533	0.501202
555	0.493719	0.509948	0.47749	0.536285	0.564833	0.507738	0.528018	0.562821	0.493214
554	0.464119	0.480619	0.447619	0.563334	0.593719	0.532949	0.508251	0.542171	0.474332
553	0.458737	0.475359	0.442115	0.551408	0.580974	0.521842	0.522507	0.557214	0.487801
552	0.478475	0.490478	0.466472	0.547098	0.575466	0.51873	0.511222	0.543357	0.479087
551	0.451258	0.469398	0.433118	0.543037	0.573015	0.513059	0.494531	0.528598	0.460464
550	0.446659	0.465728	0.42759	0.549607	0.579572	0.519641	0.534842	0.571396	0.498288
549	0.470238	0.486883	0.453593	0.53402	0.562644	0.505396	0.522428	0.557141	0.487714
548	0.454296	0.473412	0.43518	0.529592	0.559386	0.499799	0.481528	0.515496	0.447561
547	0.468231	0.483129	0.453333	0.54317	0.572203	0.514136	0.493391	0.525789	0.460994
546	0.430894	0.453044	0.408744	0.534452	0.564727	0.504177	0.518522	0.556002	0.481042
545	0.456592	0.475311	0.437873	0.522544	0.551836	0.493253	0.478039	0.511616	0.444463
544	0.465447	0.480777	0.450117	0.553687	0.583932	0.523443	0.460315	0.491225	0.429405
543	0.473408	0.496768	0.450048	0.541076	0.573257	0.508895	0.480655	0.517141	0.444169
542	0.477207	0.495068	0.459346	0.529594	0.558988	0.500201	0.479959	0.513159	0.446759
541	0.461897	0.474063	0.449731	0.530068	0.558084	0.502051	0.452391	0.48144	0.423342
540	0.428207	0.456038	0.400376	0.538929	0.572114	0.505743	0.501972	0.542362	0.461583
539	0.431144	0.454373	0.407915	0.524894	0.556096	0.493692	0.477691	0.513959	0.441422
538	0.42486	0.447464	0.402256	0.51012	0.54004	0.4802	0.477887	0.513768	0.442006
537	0.468583	0.49114	0.446026	0.530347	0.56149	0.499204	0.483057	0.519143	0.446972
536	0.43909	0.465751	0.412429	0.529329	0.561384	0.497274	0.504493	0.544194	0.464792
535	0.45087	0.472618	0.429122	0.565602	0.599038	0.532166	0.473008	0.508131	0.437884
534	0.477459	0.499096	0.455822	0.538071	0.569111	0.507031	0.492163	0.528104	0.456223
533	0.441404	0.461231	0.421577	0.531677	0.562117	0.501236	0.473291	0.507272	0.439309
532	0.440053	0.464423	0.415683	0.525801	0.556985	0.494617	0.496893	0.534753	0.459034
531	0.468839	0.486932	0.450746	0.521345	0.550312	0.492378	0.482874	0.516343	0.449406
530	0.442146	0.465607	0.418685	0.538539	0.570425	0.506653	0.488755	0.525668	0.451842
529	0.485562	0.5106	0.460524	0.550685	0.583561	0.517809	0.502742	0.541294	0.46419
528	0.446703	0.472361	0.421045	0.557872	0.591352	0.524392	0.506846	0.545984	0.467708
527	0.4624	0.483842	0.440958	0.540339	0.572195	0.508483	0.466815	0.501466	0.432165
526	0.458366	0.490469	0.426263	0.542598	0.577328	0.507868	0.517648	0.561712	0.473584
525	0.468293	0.490418	0.446168	0.528198	0.558863	0.497534	0.489873	0.526004	0.453743
524	0.444148	0.468544	0.419752	0.524078	0.555515	0.492642	0.484626	0.521959	0.447294
523	0.451114	0.475205	0.427023	0.529009	0.560566	0.497453	0.485051	0.522203	0.447898
522	0.463334	0.485652	0.441016	0.520763	0.550869	0.490656	0.493169	0.529569	0.456768
521	0.448031	0.470984	0.425078	0.533008	0.565562	0.500454	0.450153	0.485021	0.415285
520	0.450557	0.47148	0.429634	0.525972	0.55693	0.495015	0.455187	0.488984	0.42139
519	0.431069	0.450195	0.411943	0.51678	0.545673	0.487887	0.486745	0.52097	0.45252
518	0.430574	0.44783	0.413318	0.521076	0.549374	0.492778	0.503352	0.537399	0.469305
517	0.447147	0.46216	0.432134	0.529024	0.557637	0.50041	0.467855	0.498994	0.436717
516	0.438637	0.457998	0.419276	0.512643	0.541064	0.484221	0.502906	0.538045	0.467767
515	0.444544	0.459267	0.429821	0.532189	0.560746	0.503631	0.478246	0.50978	0.446712
514	0.448485	0.463436	0.433534	0.502159	0.529366	0.474952	0.457899	0.4885	0.427298
513	0.446481	0.459349	0.433613	0.537717	0.56637	0.509064	0.449047	0.478222	0.419872
512	0.430195	0.445467	0.414923	0.528966	0.557519	0.500412	0.473038	0.504566	0.44151
511	0.449086	0.459676	0.438496	0.547851	0.576062	0.51964	0.492378	0.522979	0.461776
510	0.441738	0.455745	0.427731	0.519617	0.547285	0.49195	0.470835	0.501656	0.440014
509	0.441516	0.460676	0.422356	0.523658	0.552525	0.494791	0.501669	0.536638	0.466701
508	0.444803	0.456101	0.433505	0.510393	0.536828	0.483959	0.482434	0.512748	0.452119
507	0.453636	0.467714	0.439558	0.530737	0.558925	0.502548	0.478442	0.50969	0.447193
506	0.428314	0.440991	0.415637	0.519983	0.54732	0.492647	0.46964	0.499816	0.439463
505	0.443338	0.463049	0.423627	0.524789	0.554321	0.495257	0.4772	0.511299	0.4431
504	0.414616	0.428528	0.400704	0.504228	0.530706	0.47775	0.496774	0.528908	0.46464
503	0.417189	0.427094	0.407284	0.527818	0.555053	0.500583	0.449505	0.477524	0.421485
502	0.420259	0.43467	0.405848	0.504722	0.531887	0.477557	0.441507	0.47101	0.412004
501	0.420233	0.431089	0.409377	0.529626	0.557059	0.502193	0.461643	0.490667	0.432618
500	0.415016	0.428232	0.4018	0.523967	0.55168	0.496254	0.455879	0.485566	0.426193

## Sheet: SSA(smoldering) Vs. Size( X)
WL	Size(X)-500	SSA_CS_500	SSA_RS_500	SSA_WS_500		Size(X)-400	SSA_CS_400	SSA_RS_400	SSA_WS_400		Size(X)-300	SSA_CS_300	SSA_RS_300	SSA_WS_300
660	2.37992	0.49345	0.633514	0.726552		1.90393			0.525927		1.42795	0.600304
659	2.38353	0.549097	0.62761	0.73585		1.90682			0.42341		1.43012	0.606136
658	2.38715	0.480117	0.810854	0.72082		1.90972			0.455427		1.43229	0.567949
657	2.39079	0.548082	0.61371	0.621179		1.91263			0.439714		1.43447	0.550562
656	2.39443	0.552662	0.769403	0.736661		1.91554			0.544262		1.43666	0.492318
655	2.39809	0.496747	0.63638	0.728398		1.91847			0.546228		1.43885	0.458519
654	2.40175	0.45801	0.805163	0.678644		1.9214			0.489596		1.44105	0.43534
653	2.40543	0.583115	0.751625	0.615234		1.92434		0.489258	0.512086		1.44326	0.458632	0.67302
652	2.40912	0.653077	0.628571	0.715523		1.9273		0.53344	0.666445		1.44547	0.463463	0.662437
651	2.41282	0.588464	0.731259	0.726552		1.93026	0.645265	0.555528	0.58688		1.44769	0.421233	0.619595	0.66263
650	2.41653	0.599508	0.666113	0.73585		1.93323	0.527484	0.556983	0.637379		1.44992	0.49119	0.642696	0.671049
649	2.42026	0.487697	0.725992	0.708205		1.9362	0.665617	0.617401	0.618061		1.45215	0.511899	0.623005	0.623246
648	2.42399	0.533084	0.596606	0.621179		1.93919	0.676203	0.464499	0.630886		1.45439	0.401129	0.564761	0.648314
647	2.42774	0.433475	0.719916	0.756661		1.94219	0.595161	0.545069	0.559187		1.45664	0.49533	0.648994	0.63837
646	2.4315	0.509535	0.571521	0.728398		1.9452	0.533413	0.648472	0.615697		1.4589	0.434067	0.545194	0.570264
645	2.43527	0.662261	0.650773	0.678644		1.94821	0.667065	0.477593	0.65432		1.46116	0.401463	0.503865	0.467183
644	2.43905	0.44572	0.604958	0.615234		1.95124	0.483606	0.50754	0.537575		1.46343	0.400325	0.539631	0.556705
643	2.44284	0.418338	0.743308	0.715523		1.95427	0.495498	0.606029	0.61483		1.4657	0.545548	0.473208	0.454694
642	2.44664	0.437491	0.679939	0.7082		1.95732	0.587088	0.642922	0.626685		1.46799	0.511053	0.564606	0.496717
641	2.45046	0.42165	0.598223	0.621179		1.96037	0.705409	0.594815	0.627092		1.47028	0.517499	0.641897	0.541483
640	2.45429	0.419777	0.682111	0.726661		1.96343	0.543848	0.666958	0.627979		1.47257	0.497027	0.63489	0.602706
639	2.45813	0.429345	0.630239	0.728398		1.96651	0.671441	0.586504	0.596848		1.47488	0.440237	0.570416	0.558115
638	2.46198	0.579097	0.600175	0.678644		1.96959	0.626235	0.562759	0.597103		1.47719	0.441435	0.581222	0.588903
637	2.46585	0.420117	0.623742	0.615234		1.97268	0.570115	0.595797	0.606674		1.47951	0.468082	0.546553	0.529239
636	2.46973	0.580818	0.673021	0.715523		1.97578	0.511739	0.590634	0.558572		1.48184	0.449704	0.534851	0.492691
635	2.47362	0.552662	0.624673	0.723282		1.97889	0.565016	0.635547	0.667166		1.48417	0.458648	0.56482	0.514958
634	2.47752	0.496747	0.680594	0.722086		1.98201	0.641515	0.656803	0.660878		1.48651	0.475862	0.557164	0.533453
633	2.48143	0.45801	0.667435	0.764527		1.98515	0.538392	0.642783	0.660759		1.48886	0.465843	0.54862	0.540098
632	2.48536	0.583115	0.680306	0.761422		1.98829	0.590036	0.5757	0.553344		1.49121	0.465317	0.557921	0.547245
631	2.4893	0.429345	0.590861	0.686458		1.99144	0.576936	0.606029	0.666847		1.49358	0.440897	0.541272	0.556589
630	2.49325	0.579097	0.721481	0.662128		1.9946	0.59192	0.642922	0.609171		1.49595	0.462965	0.549713	0.547228
629	2.49721	0.420117	0.641408	0.62052		1.99777	0.584501	0.594815	0.679786		1.49833	0.42615	0.571267	0.508019
628	2.50119	0.580818	0.726439	0.703948		2.00095	0.617332	0.666958	0.596848		1.50071	0.457291	0.578846	0.50454
627	2.50518	0.552662	0.610919	0.717309		2.00414	0.604945	0.625066	0.597103		1.50311	0.487018	0.558479	0.5102
626	2.50918	0.496747	0.680558	0.662246		2.00734	0.497637	0.649105	0.614766		1.50551	0.480144	0.560288	0.548054
625	2.51319	0.45801	0.70481	0.702005		2.01055	0.589411	0.651314	0.596848		1.50792	0.467536	0.554069	0.497858
624	2.51722	0.53115	0.631143	0.742308		2.01378	0.576091	0.663472	0.597103		1.51033	0.453118	0.572524	0.498456
623	2.52126	0.530548	0.634573	0.696778		2.01701	0.603047	0.552358	0.596848		1.51276	0.434518	0.608246	0.550499
622	2.52532	0.5087	0.748917	0.665698		2.02025	0.596645	0.595965	0.597103		1.51519	0.446019	0.596064	0.553694
621	2.52938	0.529483	0.762672	0.653748		2.02351	0.623347	0.624703	0.61483		1.51763	0.44601	0.590562	0.566808
620	2.53346	0.510657	0.635693	0.643152		2.02677	0.535889	0.606029	0.656685		1.52008	0.451743	0.561447	0.503094
619	2.53755	0.445243	0.627074	0.71577		2.03004	0.512473	0.642922	0.649171		1.52253	0.455515	0.532434	0.491747
618	2.54166	0.52966	0.629941	0.763412		2.03333	0.591116	0.594815	0.627979		1.525	0.468621	0.546353	0.50606
617	2.54578	0.464431	0.658325	0.640242		2.03662	0.560984	0.666958	0.666847		1.52747	0.463291	0.605339	0.511436
616	2.54991	0.472696	0.606116	0.650251		2.03993	0.520454	0.60775	0.656685		1.52995	0.494597	0.602525	0.555416
615	2.55406	0.553518	0.647358	0.691064		2.04325	0.62159	0.6664	0.609171		1.53244	0.467722	0.563249	0.53218
614	2.55822	0.505279	0.666226	0.599058		2.04657	0.653187	0.629509	0.647979		1.53493	0.451066	0.584491	0.477709
613	2.56239	0.429345	0.686984	0.564208		2.04991	0.54158	0.718041	0.596848		1.53743	0.464205	0.562349	0.519041
612	2.56658	0.579097	0.686343	0.657488		2.05326	0.509111	0.676269	0.597103		1.53995	0.466169	0.583508	0.510996
611	2.57078	0.420117	0.598342	0.689172		2.05662	0.474176	0.627106	0.636685		1.54247	0.48093	0.550133	0.531316
610	2.57499	0.580818	0.639814	0.690858		2.05999	0.506378	0.643022	0.609171		1.545	0.45779	0.550192	0.516377
609	2.57922	0.552662	0.614685	0.636933		2.06338	0.563882	0.65762	0.679786		1.54753	0.465182	0.54291	0.50716
608	2.58346	0.496747	0.599214	0.649925		2.06677	0.51564	0.635501	0.666847		1.55008	0.482499	0.535581	0.524863
607	2.58772	0.45801	0.64586	0.574403		2.07018	0.475291	0.648258	0.609171		1.55263	0.467239	0.557271	0.520764
606	2.59199	0.583115	0.590308	0.600388		2.07359	0.589411	0.682936	0.647979		1.55519	0.460501	0.525596	0.505518
605	2.59627	0.429345	0.643082	0.629184		2.07702	0.576091	0.657897	0.596848		1.55776	0.424843	0.550815	0.530583
604	2.60057	0.579097	0.621747	0.735623		2.08046	0.603047	0.621123	0.597103		1.56034	0.439763	0.52394	0.491323
603	2.60489	0.420117	0.666226	0.653375		2.08391	0.596645	0.619289	0.636685		1.56293	0.44833	0.553036	0.482626
602	2.60921	0.580818	0.686984	0.55683		2.08737	0.623347	0.584536	0.609171		1.56553	0.415647	0.519401	0.53206
601	2.61355	0.552662	0.686343	0.609083		2.09084	0.535889	0.606029	0.679786		1.56813	0.436195	0.538021	0.507332
600	2.61791	0.496747	0.598342	0.653414		2.09433	0.512473	0.642922	0.596848		1.57075	0.428269	0.538698	0.497067
599	2.62228	0.45801	0.639814	0.657488		2.09782	0.591116	0.594815	0.597103		1.57337	0.411968	0.498588	0.472139
598	2.62667	0.583115	0.614685	0.689172		2.10133	0.560984	0.666958	0.666847		1.576	0.417445	0.52045	0.458448
597	2.63107	0.542934	0.585921	0.690858		2.10485	0.520454	0.642922	0.596848		1.57864	0.376656	0.523893	0.495934
596	2.63548	0.579097	0.64586	0.636933		2.10838	0.62159	0.594815	0.597103		1.58129	0.37435	0.5035	0.478742
595	2.63991	0.542012	0.590308	0.649925		2.11193	0.653187	0.666958	0.596848		1.58395	0.405303	0.515852	0.449316
594	2.64435	0.580818	0.643082	0.574403		2.11548	0.54158	0.674563	0.597103		1.58661	0.364062	0.497725	0.44785
593	2.64881	0.552662	0.652175	0.600388		2.11905	0.509111	0.623475	0.660106		1.58929	0.44086	0.507313	0.46247
592	2.65329	0.496747	0.666226	0.629184		2.12263	0.474176	0.606029	0.606755		1.59197	0.35965	0.525068	0.462668
591	2.65778	0.45801	0.686984	0.735623		2.12622	0.506378	0.642922	0.594837		1.59467	0.394899	0.51875	0.443644
590	2.66228	0.583115	0.686343	0.653375		2.12983	0.563882	0.594815	0.644036		1.59737	0.449693	0.449411	0.427015
589	2.6668	0.47025	0.598342	0.65683		2.13344	0.51564	0.666958	0.640253		1.60008	0.329923	0.52071	0.43667
588	2.67134	0.456574	0.639814	0.609083		2.13707	0.475291	0.606029	0.666847		1.6028	0.430346	0.547575	0.468383
587	2.67589	0.46515	0.614685	0.653414		2.14071	0.441684	0.642922	0.609171		1.60553	0.340987	0.523062	0.455729
586	2.68045	0.519324	0.625592	0.657488		2.14436	0.516578	0.594815	0.637979		1.60827	0.437972	0.542242	0.48627
585	2.68504	0.535663	0.64586	0.689172		2.14803	0.420909	0.666958	0.596848		1.61102	0.34337	0.483416	0.458215
584	2.68963	0.597322	0.590308	0.639086		2.15171	0.507017	0.606029	0.597103		1.61378	0.505433	0.54363	0.480361
583	2.69425	0.551284	0.643082	0.636933		2.1554	0.457012	0.642922	0.626685		1.61655	0.535735	0.552065	0.485324
582	2.69888	0.54866	0.666226	0.649925		2.1591	0.461715	0.594815	0.609171		1.61933	0.548643	0.547003	0.477295
581	2.70352	0.495253	0.686984	0.574403		2.16282	0.486838	0.666958	0.579786		1.62211	0.494899	0.543052	0.486075
580	2.70818	0.560837	0.677902	0.600388		2.16655	0.550705	0.633212	0.596848		1.62491	0.549693	0.531664	0.478742
580	2.70818	0.541992	0.693325	0.629184		2.16655	0.599141	0.610249	0.540578		1.62491	0.540882	0.484744	0.465421
579	2.71286	0.54254	0.72072	0.673562		2.17029	0.594686	0.596506	0.474413		1.62772	0.533704	0.51251	0.547694
578	2.71755	0.436911	0.672306	0.653375		2.17404	0.596486	0.662845	0.508727		1.63053	0.516092	0.487611	0.484008
577	2.72226	0.541188	0.620521	0.675568		2.17781	0.58702	0.665032	0.616841		1.63336	0.48238	0.534239	0.530709
576	2.72699	0.48512	0.658093	0.609083		2.18159	0.556308	0.628619	0.658501		1.63619	0.510804	0.522407	0.507183
575	2.73173	0.542925	0.677797	0.653414		2.18539	0.543815	0.652048	0.612132		1.63904	0.528091	0.514104	0.506619
574	2.73649	0.492099	0.640589	0.769057		2.18919	0.603339	0.59436	0.598764		1.64189	0.484922	0.543568	0.552944
573	2.74127	0.527723	0.712824	0.739376		2.19301	0.548983	0.676469	0.582445		1.64476	0.567958	0.553111	0.53885
572	2.74606	0.495717	0.658368	0.756821		2.19685	0.623223	0.637986	0.500118		1.64764	0.46551	0.517054	0.477658
571	2.75087	0.524922	0.690444	0.732745		2.20069	0.731619	0.661677	0.516736		1.65052	0.475734	0.541562	0.491072
570	2.75569	0.467039	0.655776	0.75131		2.20456	0.609093	0.647882	0.639536		1.65342	0.48854	0.547032	0.539281
569	2.76054	0.541992	0.643689	0.71146		2.20843	0.563541	0.72125	0.640578		1.65632	0.561622	0.535301	0.528841
568	2.7654	0.425397	0.657296	0.728372		2.21232	0.638875	0.603465	0.474413		1.65924	0.467456	0.558166	0.50555
567	2.77028	0.436911	0.706155	0.671772		2.21622	0.675129	0.689889	0.508727		1.66217	0.472559	0.571695	0.497358
566	2.77517	0.411885	0.659759	0.651373		2.22014	0.551843	0.5695	0.616841		1.6651	0.488344	0.540508	0.542535
565	2.78008	0.4512	0.700005	0.754307		2.22407	0.639759	0.704991	0.658501		1.66805	0.473613	0.520186	0.486772
564	2.78501	0.429245	0.607086	0.740837		2.22801	0.619921	0.633212	0.612132		1.67101	0.500971	0.549857	0.511158
563	2.78996	0.432099	0.659043	0.754074		2.23197	0.65032	0.610249	0.598764		1.67397	0.448267	0.555827	0.473087
562	2.79492	0.527723	0.701533	0.683219		2.23594	0.625944	0.596506	0.52247		1.67695	0.444395	0.533133	0.459954
561	2.7999	0.495717	0.735909	0.728787		2.23992	0.645289	0.662845	0.483871		1.67994	0.452231	0.542586	0.51278
560	2.8049	0.524922	0.650787	0.693305		2.24392	0.605843	0.665032	0.523015		1.68294	0.450223	0.549481	0.47005
559	2.80992	0.467039	0.659069	0.622442		2.24794	0.626703	0.628619	0.519519		1.68595	0.464385	0.533711	0.523709
558	2.81496	0.47509	0.719733	0.711687		2.25197	0.594469	0.652048	0.483626		1.68897	0.454703	0.548242	0.513178
557	2.82001	0.432099	0.73942	0.680235		2.25601	0.717173	0.59436	0.494053		1.69201	0.485104	0.546814	0.510136
556	2.82508	0.527723	0.710658	0.762157		2.26007	0.650776	0.59816	0.539715		1.69505	0.429936	0.542647	0.535368
555	2.83017	0.495717	0.734866	0.698338		2.26414	0.678952	0.551476	0.545892		1.6981	0.493719	0.536285	0.528018
554	2.83528	0.524922	0.712824	0.66718		2.26823	0.668414	0.596458	0.525905		1.70117	0.464119	0.563334	0.508251
553	2.84041	0.467039	0.681564	0.664089		2.27233	0.732817	0.630525	0.558423		1.70425	0.458737	0.551408	0.522507
552	2.84555	0.47509	0.705478	0.737907		2.27644	0.675441	0.600571	0.534557		1.70733	0.478475	0.547098	0.511222
551	2.85072	0.541992	0.739388	0.779235		2.28057	0.54518	0.626254	0.526879		1.71043	0.451258	0.543037	0.494531
550	2.8559	0.425397	0.753497	0.793827		2.28472	0.635575	0.627174	0.527827		1.71354	0.446659	0.549607	0.534842
549	2.8611	0.436911	0.678719	0.690238		2.28888	0.715599	0.610217	0.498732		1.71666	0.470238	0.53402	0.522428
548	2.86632	0.411885	0.67959	0.643289		2.29306	0.626298	0.615863	0.496634		1.71979	0.454296	0.529592	0.481528
547	2.87156	0.4512	0.659759	0.752582		2.29725	0.647571	0.632491	0.539704		1.72294	0.468231	0.54317	0.493391
546	2.87682	0.429245	0.700005	0.762698		2.30146	0.645492	0.587834	0.517024		1.72609	0.430894	0.534452	0.518522
545	2.8821	0.432099	0.607086	0.708115		2.30568	0.70266	0.57567	0.429095		1.72926	0.456592	0.522544	0.478039
544	2.8874	0.527723	0.650425	0.74136		2.30992	0.635334	0.630607	0.485691		1.73244	0.465447	0.553687	0.460315
543	2.89272	0.495717	0.701533	0.721958		2.31417	0.641439	0.591842	0.521463		1.73563	0.473408	0.541076	0.480655
542	2.89806	0.524922	0.735909	0.635132		2.31844	0.655778	0.652705	0.52314		1.73883	0.477207	0.529594	0.479959
541	2.90341	0.467039	0.650787	0.753598		2.32273	0.705067	0.552493	0.577972		1.74205	0.461897	0.530068	0.452391
540	2.90879	0.47509	0.659069	0.629237		2.32703	0.560797	0.636612	0.441228		1.74527	0.428207	0.538929	0.501972
539	2.91419	0.462544	0.719733	0.734693		2.33135	0.600559	0.650067	0.523785		1.74851	0.431144	0.524894	0.477691
538	2.9196	0.449007	0.73942	0.780061		2.33568	0.585043	0.663697	0.499286		1.75176	0.42486	0.51012	0.477887
537	2.92504	0.483387	0.710658	0.714347		2.34003	0.623664	0.625133	0.478162		1.75502	0.468583	0.530347	0.483057
536	2.9305	0.446489	0.734866	0.696819		2.3444	0.661326	0.721228	0.557071		1.7583	0.43909	0.529329	0.504493
535	2.93597	0.571168	0.658017	0.627558		2.34878	0.598872	0.632306	0.466904		1.76158	0.45087	0.565602	0.473008
534	2.94147	0.481244	0.681564	0.758756		2.35318	0.731793	0.624512	0.472534		1.76488	0.477459	0.538071	0.492163
533	2.94699	0.545454	0.705478	0.672752		2.35759	0.608297	0.639901	0.492784		1.76819	0.441404	0.531677	0.473291
532	2.95253	0.469431	0.673877	0.691604		2.36202	0.602657	0.595809	0.498219		1.77152	0.440053	0.525801	0.496893
531	2.95809	0.469265	0.73535	0.673884		2.36647	0.646668	0.670713	0.534048		1.77485	0.468839	0.521345	0.482874
530	2.96367	0.473247	0.678719	0.737282		2.37094	0.602347	0.670315	0.476655		1.7782	0.442146	0.538539	0.488755
529	2.96927	0.490257	0.73959	0.74743		2.37542	0.610151	0.668017	0.44864		1.78156	0.485562	0.550685	0.502742
528	2.9749	0.514938	0.708266	0.775885		2.37992	0.666876	0.628361	0.494796		1.78494	0.446703	0.557872	0.506846
527	2.98054	0.540835	0.724554	0.657547		2.38443	0.590458	0.68082	0.616507		1.78833	0.4624	0.540339	0.466815
526	2.98621	0.535545	0.702608	0.730008		2.38897	0.581178	0.624032	0.511502		1.79173	0.458366	0.542598	0.517648
525	2.9919	0.493501	0.699868	0.68332		2.39352	0.581678	0.598805	0.512548		1.79514	0.468293	0.528198	0.489873
524	2.99761	0.496725	0.762559	0.693938		2.39809	0.668596	0.604079	0.602264		1.79856	0.444148	0.524078	0.484626
523	3.00334	0.540825	0.647476	0.732066		2.40267	0.575312	0.636401	0.524703		1.802	0.451114	0.529009	0.485051
522	3.00909	0.501189	0.729374	0.727262		2.40727	0.616102	0.61889	0.482391		1.80546	0.463334	0.520763	0.493169
521	3.01487	0.528928	0.680676	0.679933		2.41189	0.593772	0.632524	0.519298		1.80892	0.448031	0.533008	0.450153
520	3.02067	0.465157	0.655533	0.736021		2.41653	0.624796	0.663377	0.538369		1.8124	0.450557	0.525972	0.455187
519	3.02649	0.517545	0.664171	0.718076		2.42119	0.618125	0.655251	0.551661		1.81589	0.431069	0.51678	0.486745
518	3.03233	0.446489	0.708465	0.676903		2.42586	0.585917	0.686633	0.531695		1.8194	0.430574	0.521076	0.503352
517	3.03819	0.571168	0.675334	0.731391		2.43055	0.59993	0.617875	0.555811		1.82292	0.447147	0.529024	0.467855
516	3.04408	0.481244	0.71765	0.699123		2.43527	0.597414	0.654902	0.49303		1.82645	0.438637	0.512643	0.502906
515	3.04999	0.545454	0.749739	0.708796		2.43999	0.555611	0.645789	0.586781		1.83023	0.444544	0.532189	0.478246
514	3.05593	0.469431	0.779724	0.703776		2.44474	0.561047	0.656373	0.553555		1.83356	0.448485	0.502159	0.457899
513	3.06188	0.469265	0.728252	0.668265		2.44951	0.578066	0.635461	0.507848		1.83713	0.446481	0.537717	0.449047
512	3.06786	0.473247	0.666263	0.710717		2.45429	0.578951	0.652339	0.496661		1.84072	0.430195	0.528966	0.473038
511	3.07387	0.490257	0.716346	0.766775		2.45909	0.649111	0.651823	0.531375		1.84432	0.449086	0.547851	0.492378
510	3.07989	0.514938	0.657771	0.79931		2.46392	0.513611	0.667217	0.51785		1.84794	0.441738	0.519617	0.470835
509	3.08594	0.540835	0.717478	0.721843		2.46876	0.596961	0.673801	0.494172		1.85157	0.441516	0.523658	0.501669
508	3.09202	0.535545	0.70391	0.5925		2.47362	0.583804	0.618631	0.465974		1.85521	0.444803	0.510393	0.482434
507	3.09812	0.493501	0.667211	0.650891		2.47849	0.623256	0.638347	0.488245		1.85887	0.453636	0.530737	0.478442
506	3.10424	0.496725	0.754388	0.684173		2.48339	0.595362	0.597961	0.517281		1.86254	0.428314	0.519983	0.46964
505	3.11039	0.540825	0.720805	0.776738		2.48831	0.599153	0.627387	0.56432		1.86623	0.443338	0.524789	0.4772
504	3.11656	0.501189	0.708117	0.761847		2.49325	0.640357	0.600281	0.54358		1.86994	0.414616	0.504228	0.496774
503	3.12276	0.528928	0.704635	0.795668		2.4982	0.558834	0.643555	0.468331		1.87365	0.417189	0.527818	0.449505
502	3.12898	0.465157	0.673644	0.702957		2.50318	0.584903	0.595171	0.570868		1.87739	0.420259	0.504722	0.441507
501	3.13522	0.517545	0.65625	0.736603		2.50818	0.602284	0.611856	0.426858		1.88113	0.420233	0.529626	0.461643
500	3.14149	0.54476	0.68432	0.739801		2.51319	0.598113	0.611071	0.47743		1.8849	0.415016	0.523967	0.455879

## Sheet: SSA(Flaming) Vs. Size(X)
WL	Size(X)-500	SSA_CF_500	SSA_RF_500	SSA_WF_500		Size(X)-400	SSA_CF_400	SSA_RF_400	SSA_WF_400		Size(X)-300	SSA_CF_300	SSA_RF_300	SSA_WF_300
660	2.37992	0.651175	0.664486	0.74358		1.90393					1.42795
659	2.38353	0.552185	0.697228	0.714499		1.90682					1.43012
658	2.38715	0.614084	0.530389	0.684108		1.90972					1.43229	0.672134
657	2.39079	0.610371	0.557919	0.696906		1.91263					1.43447	0.627646
656	2.39443	0.65341	0.564129	0.672739		1.91554					1.43666	0.59514
655	2.39809	0.672317	0.629836	0.680874		1.91847					1.43885	0.576417
654	2.40175	0.592766	0.697529	0.732995		1.9214					1.44105	0.573334
653	2.40543	0.659135	0.677631	0.762993		1.92434	0.572501	0.45346	0.459547		1.44326	0.605017
652	2.40912	0.681693	0.550326	0.652243		1.9273	0.498216	0.482725	0.433339		1.44547	0.558877
651	2.41282	0.724008	0.589909	0.666781		1.93026	0.502928	0.426465	0.472424		1.44769	0.568344	0.671491
650	2.41653	0.536868	0.57458	0.683853		1.93323	0.412284	0.473975	0.439645		1.44992	0.549187	0.650806	0.632751
649	2.42026	0.621436	0.587015	0.646452		1.9362	0.639004	0.369242	0.44767		1.45215	0.587651	0.627756	0.604243
648	2.42399	0.711853	0.544644	0.672318		1.93919	0.572684	0.427593	0.365013		1.45439	0.567297	0.667384	0.630655
647	2.42774	0.760146	0.570375	0.693105		1.94219	0.550292	0.43956	0.408441		1.45664	0.556457	0.664885	0.633071
646	2.4315	0.534918	0.561946	0.698711		1.9452	0.417757	0.409854	0.630877		1.4589	0.57052	0.641792	0.576645
645	2.43527	0.629164	0.581109	0.742677		1.94821	0.620425	0.386819	0.408934		1.46116	0.564962	0.51938	0.583934
644	2.43905	0.523491	0.568546	0.7267		1.95124	0.49854	0.491578	0.567595		1.46343	0.509495	0.743092	0.550736
643	2.44284	0.609133	0.615206	0.688082		1.95427	0.436138	0.42908	0.514002		1.4657	0.577639	0.500754	0.564679
642	2.44664	0.552137	0.657857	0.695538		1.95732	0.422822	0.491564	0.410217		1.46799	0.542288	0.62301	0.618317
641	2.45046	0.545096	0.689104	0.735408		1.96037	0.522562	0.485782	0.349042		1.47028	0.561189	0.712019	0.659204
640	2.45429	0.558885	0.660637	0.754998		1.96343	0.513667	0.497477	0.442431		1.47257	0.581614	0.648324	0.628596
639	2.45813	0.69528	0.690488	0.629372		1.96651	0.626422	0.510552	0.455935		1.47488	0.547489	0.698568	0.566146
638	2.46198	0.571558	0.651037	0.656696		1.96959	0.692948	0.514747	0.480342		1.47719	0.562798	0.654385	0.574367
637	2.46585	0.659749	0.608652	0.646493		1.97268	0.619025	0.483367	0.49596		1.47951	0.555085	0.582637	0.554087
636	2.46973	0.686405	0.595851	0.679482		1.97578	0.513667	0.523711	0.491652		1.48184	0.563877	0.622688	0.570142
635	2.47362	0.697442	0.567216	0.673104		1.97889	0.629459	0.510772	0.452107		1.48417	0.576812	0.608648	0.562861
634	2.47752	0.549964	0.627692	0.657762		1.98201	0.529321	0.445915	0.53481		1.48651	0.552652	0.63357	0.569496
633	2.48143	0.640177	0.644436	0.693429		1.98515	0.50577	0.524095	0.504412		1.48886	0.586064	0.536671	0.583056
632	2.48536	0.546425	0.612291	0.64376		1.98829	0.51172	0.518735	0.503665		1.49121	0.559794	0.589282	0.561129
631	2.4893	0.663335	0.6745	0.653468		1.99144	0.499234	0.600765	0.469279		1.49358	0.559953	0.589174	0.568044
630	2.49325	0.631283	0.639884	0.700034		1.9946	0.480844	0.559895	0.479351		1.49595	0.563504	0.532809	0.566163
629	2.49721	0.623653	0.675591	0.709951		1.99777	0.604067	0.391115	0.489929		1.49833	0.544263	0.594553	0.569188
628	2.50119	0.641251	0.657699	0.659087		2.00095	0.500119	0.354175	0.522533		1.50071	0.555932	0.606043	0.596744
627	2.50518	0.584708	0.671968	0.648222		2.00414	0.565333	0.466663	0.53123		1.50311	0.572269	0.627896	0.59499
626	2.50918	0.548205	0.64656	0.663864		2.00734	0.537685	0.670769	0.470021		1.50551	0.580594	0.54212	0.605268
625	2.51319	0.573203	0.605627	0.672718		2.01055	0.501532	0.635322	0.62131		1.50792	0.594071	0.541401	0.559561
624	2.51722	0.568716	0.617382	0.707766		2.01378	0.645524	0.55714	0.48545		1.51033	0.558025	0.525144	0.567765
623	2.52126	0.513308	0.662655	0.717743		2.01701	0.664713	0.488963	0.494885		1.51276	0.566909	0.620762	0.619739
622	2.52532	0.646995	0.670587	0.72503		2.02025	0.636982	0.43827	0.497497		1.51519	0.551859	0.63407	0.55579
621	2.52938	0.631759	0.631948	0.665628		2.02351	0.665152	0.495491	0.479773		1.51763	0.548185	0.626991	0.574969
620	2.53346	0.582546	0.708951	0.636149		2.02677	0.664713	0.512919	0.554838		1.52008	0.554162	0.566472	0.573291
619	2.53755	0.649518	0.548331	0.66075		2.03004	0.636982	0.600765	0.553029		1.52253	0.565539	0.554466	0.56401
618	2.54166	0.707234	0.567406	0.701463		2.03333	0.439865	0.508034	0.5026		1.525	0.578527	0.599662	0.572989
617	2.54578	0.707752	0.730451	0.719759		2.03662	0.631531	0.428597	0.545126		1.52747	0.592573	0.590971	0.566746
616	2.54991	0.626474	0.641431	0.67954		2.03993	0.604863	0.548289	0.494205		1.52995	0.598014	0.643277	0.575648
615	2.55406	0.631479	0.629856	0.666218		2.04325	0.623222	0.497246	0.454342		1.53244	0.600868	0.589714	0.600495
614	2.55822	0.647592	0.594746	0.663128		2.04657	0.552089	0.526858	0.490955		1.53493	0.58816	0.577727	0.552751
613	2.56239	0.561173	0.614935	0.719763		2.04991	0.633463	0.56693	0.525827		1.53743	0.58004	0.560193	0.561858
612	2.56658	0.628603	0.643616	0.666918		2.05326	0.57727	0.592387	0.471244		1.53995	0.558695	0.542021	0.571654
611	2.57078	0.625325	0.656547	0.724368		2.05662	0.631531	0.527813	0.478213		1.54247	0.556511	0.592713	0.612258
610	2.57499	0.585976	0.700821	0.6846		2.05999	0.541942	0.561713	0.486643		1.545	0.581711	0.556216	0.590679
609	2.57922	0.579603	0.653725	0.642473		2.06338	0.534092	0.553958	0.543675		1.54753	0.550805	0.598527	0.582364
608	2.58346	0.563362	0.577354	0.700449		2.06677	0.520595	0.521666	0.464677		1.55008	0.568219	0.580149	0.534089
607	2.58772	0.569595	0.530496	0.626069		2.07018	0.519165	0.720688	0.544981		1.55263	0.563966	0.586802	0.548559
606	2.59199	0.544121	0.670669	0.581234		2.07359	0.536015	0.633396	0.513173		1.55519	0.544397	0.485636	0.533447
605	2.59627	0.541466	0.711697	0.694352		2.07702	0.663986	0.567834	0.489183		1.55776	0.551896	0.534259	0.566673
604	2.60057	0.597848	0.616479	0.668812		2.08046	0.655325	0.693752	0.485391		1.56034	0.532972	0.545954	0.57507
603	2.60489	0.562593	0.579379	0.639031		2.08391	0.553794	0.616128	0.489361		1.56293	0.538774	0.497821	0.519814
602	2.60921	0.636724	0.591268	0.73629		2.08737	0.508151	0.600765	0.498207		1.56553	0.562713	0.597535	0.543492
601	2.61355	0.668571	0.628001	0.579105		2.09084	0.489267	0.567834	0.504757		1.56813	0.540429	0.569556	0.551234
600	2.61791	0.651825	0.568981	0.552505		2.09433	0.465796	0.600765	0.475147		1.57075	0.542864	0.575481	0.521015
599	2.62228	0.613714	0.672093	0.661915		2.09782	0.558401	0.616128	0.560373		1.57337	0.532827	0.498003	0.514073
598	2.62667	0.583052	0.598787	0.646863		2.10133	0.541102	0.600765	0.568737		1.576	0.532502	0.515093	0.569878
597	2.63107	0.540829	0.721743	0.69186		2.10485	0.449348	0.600765	0.496128		1.57864	0.516013	0.495236	0.520678
596	2.63548	0.59912	0.560925	0.471661		2.10838	0.500757	0.659375	0.582365		1.58129	0.520624	0.522445	0.521418
595	2.63991	0.54229	0.615833	0.615288		2.11193	0.576812	0.600765	0.549707		1.58395	0.518597	0.538105	0.547222
594	2.64435	0.542917	0.700821	0.615491		2.11548	0.423251	0.600765	0.640553		1.58661	0.528562	0.51044	0.537666
593	2.64881	0.591609	0.653725	0.686569		2.11905	0.472598	0.600765	0.4985		1.58929	0.539455	0.50743	0.542849
592	2.65329	0.592766	0.577354	0.649981		2.12263	0.557877	0.605568	0.683837		1.59197	0.52322	0.521532	0.531159
591	2.65778	0.659135	0.530496	0.532364		2.12622	0.447658	0.600765	0.646114		1.59467	0.543272	0.521037	0.568979
590	2.66228	0.681693	0.670669	0.552982		2.12983	0.532364	0.595975	0.694636		1.59737	0.553701	0.542585	0.519052
589	2.6668	0.724008	0.711697	0.680714		2.13344	0.499127	0.524095	0.450838		1.60008	0.500356	0.478812	0.601379
588	2.67134	0.536868	0.616479	0.624303		2.13707	0.432489	0.518735	0.523973		1.6028	0.553454	0.54729	0.588609
587	2.67589	0.621436	0.579379	0.699083		2.14071	0.532496	0.600765	0.462349		1.60553	0.507617	0.528111	0.567444
586	2.68045	0.711853	0.532676	0.629983		2.14436	0.470393	0.582042	0.551634		1.60827	0.510315	0.502965	0.597814
585	2.68504	0.760146	0.628001	0.65714		2.14803	0.489273	0.677393	0.514863		1.61102	0.506772	0.524363	0.530433
584	2.68963	0.651175	0.518981	0.684315		2.15171	0.552331	0.640572	0.52989		1.61378	0.54499	0.536532	0.583751
583	2.69425	0.552185	0.672093	0.672135		2.1554	0.513448	0.570212	0.531304		1.61655	0.552377	0.565941	0.538214
582	2.69888	0.614084	0.549879	0.594914		2.1591	0.469311	0.57192	0.624967		1.61933	0.550493	0.519035	0.555598
581	2.70352	0.610371	0.621743	0.560596		2.16282	0.634659	0.511708	0.573504		1.62211	0.565735	0.498837	0.571063
580	2.70818	0.65341	0.606093	0.549681		2.16655	0.673411	0.560598	0.603478		1.62491	0.535626	0.473858	0.531759
580	2.70818	0.672317	0.615533	0.558934		2.16655	0.641975	0.582042	0.538367		1.62491	0.588389	0.499457	0.551641
579	2.71286	0.592766	0.699901	0.675176		2.17029	0.699972	0.677393	0.521857		1.62772	0.562434	0.49022	0.515051
578	2.71755	0.659135	0.617392	0.658865		2.17404	0.693371	0.640572	0.539085		1.63053	0.580285	0.498254	0.549503
577	2.72226	0.681693	0.585774	0.678284		2.17781	0.715428	0.570212	0.530724		1.63336	0.60344	0.553074	0.541766
576	2.72699	0.724008	0.687941	0.646243		2.18159	0.750513	0.57192	0.548506		1.63619	0.590055	0.549251	0.540417
575	2.73173	0.536868	0.585217	0.732174		2.18539	0.660404	0.511708	0.524198		1.63904	0.565794	0.550594	0.57342
574	2.73649	0.621436	0.708675	0.769057		2.18919	0.790845	0.560598	0.456389		1.64189	0.554605	0.544348	0.531204
573	2.74127	0.711853	0.650072	0.793764		2.19301	0.666067	0.5632	0.532713		1.64476	0.546903	0.540652	0.55694
572	2.74606	0.760238	0.665895	0.668208		2.19685	0.770179	0.50092	0.501723		1.64764	0.526954	0.548496	0.563792
571	2.75087	0.681172	0.635211	0.632745		2.20069	0.690889	0.511708	0.445036		1.65052	0.531828	0.535123	0.57772
570	2.75569	0.668636	0.663304	0.631009		2.20456	0.687545	0.560598	0.442488		1.65342	0.530126	0.575905	0.544028
569	2.76054	0.653341	0.703652	0.71146		2.20843	0.633992	0.652313	0.393458		1.65632	0.572546	0.574657	0.548263
568	2.7654	0.797931	0.562897	0.763718		2.21232	0.691177	0.601585	0.433783		1.65924	0.572252	0.577554	0.58497
567	2.77028	0.686028	0.69269	0.717724		2.21622	0.735892	0.57976	0.437209		1.66217	0.573517	0.604859	0.553586
566	2.77517	0.698549	0.615533	0.651373		2.22014	0.725941	0.525526	0.387026		1.6651	0.58017	0.523518	0.552367
565	2.78008	0.622209	0.585774	0.754307		2.22407	0.729239	0.511708	0.393458		1.66805	0.583683	0.52639	0.529757
564	2.78501	0.69325	0.687941	0.728372		2.22801	0.562014	0.560598	0.433783		1.67101	0.542658	0.601204	0.558121
563	2.78996	0.703565	0.625217	0.74737		2.23197	0.619053	0.559245	0.502113		1.67397	0.541778	0.573474	0.540556
562	2.79492	0.71451	0.708675	0.683219		2.23594	0.631979	0.530354	0.464304		1.67695	0.535987	0.530996	0.549483
561	2.7999	0.546898	0.650072	0.728787		2.23992	0.67994	0.526286	0.447167		1.67994	0.547207	0.637217	0.526272
560	2.8049	0.682918	0.665895	0.693305		2.24392	0.606676	0.575756	0.405475		1.68294	0.518775	0.597138	0.539879
559	2.80992	0.640104	0.635211	0.682442		2.24794	0.655076	0.68133	0.393458		1.68595	0.551945	0.599981	0.517515
558	2.81496	0.62608	0.663304	0.711687		2.25197	0.755286	0.601824	0.433783		1.68897	0.536134	0.596738	0.516765
557	2.82001	0.662711	0.703652	0.740235		2.25601	0.629627	0.543442	0.430286		1.69201	0.540626	0.556721	0.558129
556	2.82508	0.639787	0.562897	0.735216		2.26007	0.612391	0.562145	0.407662		1.69505	0.5591	0.597124	0.562729
555	2.83017	0.696134	0.69269	0.698338		2.26414	0.584848	0.620949	0.404946		1.6981	0.513686	0.56907	0.549704
554	2.83528	0.686394	0.615533	0.66718		2.26823	0.722596	0.546708	0.444355		1.70117	0.547049	0.607904	0.540882
553	2.84041	0.688934	0.601705	0.664089		2.27233	0.665106	0.569967	0.530491		1.70425	0.553026	0.610814	0.554124
552	2.84555	0.650263	0.734971	0.737907		2.27644	0.736612	0.5008	0.466783		1.70733	0.547384	0.599146	0.543557
551	2.85072	0.668266	0.644241	0.779235		2.28057	0.593997	0.540115	0.42125		1.71043	0.552675	0.570623	0.545983
550	2.8559	0.715345	0.698917	0.679383		2.28472	0.731241	0.566876	0.436556		1.71354	0.55379	0.561688	0.54001
549	2.8611	0.690141	0.560409	0.690238		2.28888	0.531003	0.487087	0.484191		1.71666	0.544684	0.61028	0.573047
548	2.86632	0.739193	0.68732	0.703289		2.29306	0.656169	0.520589	0.424108		1.71979	0.559479	0.581045	0.549289
547	2.87156	0.681839	0.708124	0.752582		2.29725	0.636596	0.503707	0.448862		1.72294	0.565914	0.574354	0.54319
546	2.87682	0.641879	0.600628	0.762698		2.30146	0.71161	0.51808	0.389267		1.72609	0.549079	0.548918	0.54848
545	2.8821	0.599749	0.668317	0.708115		2.30568	0.639395	0.537616	0.419267		1.72926	0.524312	0.545637	0.536414
544	2.8874	0.573898	0.610662	0.704136		2.30992	0.653962	0.624856	0.445359		1.73244	0.541286	0.513332	0.558898
543	2.89272	0.587111	0.595658	0.719575		2.31417	0.645272	0.529778	0.378531		1.73563	0.569789	0.564423	0.551819
542	2.89806	0.664884	0.642684	0.635132		2.31844	0.625825	0.572147	0.406279		1.73883	0.543998	0.563226	0.543837
541	2.90341	0.593932	0.685109	0.753598		2.32273	0.595705	0.600138	0.401989		1.74205	0.536873	0.590113	0.558514
540	2.90879	0.700206	0.603627	0.629237		2.32703	0.575043	0.491594	0.404927		1.74527	0.565613	0.558082	0.540417
539	2.91419	0.77336	0.584914	0.734693		2.33135	0.622598	0.515572	0.422543		1.74851	0.575278	0.523341	0.546962
538	2.9196	0.596331	0.668935	0.780061		2.33568	0.6635	0.588927	0.490585		1.75176	0.534937	0.557691	0.545319
537	2.92504	0.772197	0.625488	0.714347		2.34003	0.657798	0.561954	0.414595		1.75502	0.563777	0.573661	0.545265
536	2.9305	0.732244	0.761258	0.696819		2.3444	0.661721	0.667715	0.447839		1.7583	0.537435	0.589353	0.538066
535	2.93597	0.677257	0.73514	0.627558		2.34878	0.632726	0.628761	0.472584		1.76158	0.544983	0.545664	0.52765
534	2.94147	0.695178	0.703652	0.758756		2.35318	0.669284	0.565372	0.380718		1.76488	0.537352	0.585527	0.525123
533	2.94699	0.631916	0.562897	0.672752		2.35759	0.727561	0.508137	0.402985		1.76819	0.521486	0.516354	0.538656
532	2.95253	0.817148	0.69269	0.691604		2.36202	0.59271	0.502874	0.462684		1.77152	0.506523	0.544242	0.538856
531	2.95809	0.588107	0.615533	0.673884		2.36647	0.678332	0.633833	0.438208		1.77485	0.525937	0.572786	0.531328
530	2.96367	0.650459	0.601705	0.737282		2.37094	0.690729	0.584559	0.506087		1.7782	0.528163	0.590772	0.533624
529	2.96927	0.666855	0.734971	0.74743		2.37542	0.642307	0.556165	0.491579		1.78156	0.536355	0.551208	0.515231
528	2.9749	0.64146	0.644241	0.775885		2.37992	0.589288	0.546091	0.443887		1.78494	0.539313	0.558942	0.531462
527	2.98054	0.67973	0.698917	0.657547		2.38443	0.679374	0.592643	0.39711		1.78833	0.550547	0.56567	0.543102
526	2.98621	0.59986	0.560409	0.730008		2.38897	0.543236	0.545272	0.390817		1.79173	0.530567	0.59456	0.540447
525	2.9919	0.621202	0.68732	0.68332		2.39352	0.587058	0.57452	0.499991		1.79514	0.540093	0.565096	0.536547
524	2.99761	0.687448	0.708124	0.693938		2.39809	0.6188	0.560361	0.456077		1.79856	0.543702	0.577246	0.521254
523	3.00334	0.647206	0.600628	0.732066		2.40267	0.647788	0.547133	0.433041		1.802	0.53363	0.56649	0.536982
522	3.00909	0.673627	0.668317	0.772622		2.40727	0.626337	0.49151	0.424705		1.80546	0.530715	0.599886	0.528105
521	3.01487	0.651637	0.606625	0.699334		2.41189	0.677346	0.581817	0.465025		1.80892	0.52595	0.571919	0.510952
520	3.02067	0.642348	0.595658	0.736021		2.41653	0.60899	0.534194	0.425856		1.8124	0.565504	0.572664	0.526274
519	3.02649	0.643327	0.564268	0.70762		2.42119	0.630425	0.601444	0.446388		1.81589	0.535673	0.581754	0.517316
518	3.03233	0.658913	0.685109	0.676903		2.42586	0.68597	0.571636	0.43487		1.8194	0.550561	0.579473	0.554007
517	3.03819	0.614426	0.603627	0.71391		2.43055	0.704436	0.502849	0.425054		1.82292	0.540267	0.574809	0.506368
516	3.04408	0.684713	0.584914	0.699123		2.43527	0.623771	0.581694	0.381958		1.82645	0.536045	0.586836	0.52181
515	3.04999	0.639469	0.668935	0.708796		2.43999	0.722447	0.552832	0.452397		1.83	0.528418	0.569741	0.53768
514	3.05593	0.615651	0.625488	0.703776		2.44474	0.672338	0.49313	0.415008		1.83356	0.539028	0.585107	0.538956
513	3.06188	0.629089	0.761258	0.668265		2.44951	0.712329	0.538971	0.465603		1.83713	0.532047	0.567529	0.527282
512	3.06786	0.614406	0.63514	0.640717		2.45429	0.736158	0.534436	0.444487		1.84072	0.541266	0.561033	0.526238
511	3.07387	0.669018	0.572474	0.676678		2.45909	0.719299	0.465929	0.389009		1.84432	0.533186	0.571264	0.536377
510	3.07989	0.629331	0.553446	0.59931		2.46392	0.670027	0.51526	0.460334		1.84794	0.534475	0.557065	0.532046
509	3.08594	0.611904	0.640243	0.721843		2.46876	0.603572	0.546438	0.428201		1.85157	0.541145	0.564008	0.536446
508	3.09202	0.640075	0.633678	0.5925		2.47362	0.672822	0.478795	0.381001		1.85521	0.525195	0.58647	0.530519
507	3.09812	0.666475	0.63214	0.650891		2.47849	0.655895	0.505054	0.417859		1.85887	0.539864	0.567467	0.524257
506	3.10424	0.679848	0.654	0.684173		2.48339	0.630883		0.412864		1.86254	0.519779	0.52836	0.53354
505	3.11039	0.57232	0.7345	0.776738		2.48831	0.697482		0.359585		1.86623	0.523491	0.543362	0.533104
504	3.11656	0.64134	0.617805	0.761847		2.49325	0.584889		0.396503		1.86994	0.539081	0.534139	0.540867
503	3.12276	0.651382	0.646341	0.795668		2.4982	0.604101		0.420783		1.87365	0.535354	0.536781	0.525002
502	3.12898	0.71517	0.6784	0.702957		2.50318	0.594999		0.367729		1.87739	0.550994	0.5376	0.514656
501	3.13522	0.671879	0.6732	0.736603		2.50818			0.388771		1.88113	0.510695	0.519012	0.534645
500	3.14149	0.690329	0.570744	0.739801		2.51319			0.466291		1.8849	0.524729	0.536566	0.523292
