# Supplementary material for: Measurement of size-dependent single scattering albedo of fresh biomassburning aerosols using the extinction-minus-scattering technique with acombination of cavity ring-down spectroscopy and nephelometry
Source: Copernicus journal article supplement (doi:10.5194/acp-16-13491-2016), 2016-11-01
Supplement: Supplementary file 3 [file acp-2016-298-definitions of abriviations in data file.docx]

Acronyms in Data File

WL= Wavelength,

SSA (ω) = Single Scattering Albedo

CF= Cedar Flaming,

RF= Red Oak Flaming,

WF= White Pine Flaming

CS= Cedar Smoldering,

RS= Red Oak Smoldering,

WS= White Pine Smoldering

SSA +Error= SSA plus Error,

SSA -Error= SSA minus Error.
